# Supplementary material for: Hyperkalaemia prevalence, recurrence and treatment in patients on haemodialysis in China: protocol for a prospective multicentre cohort study (PRECEDE-K)
Source: PubMed Central journal article supplement — BMJ Open. 2021 Dec 22;11(12):e055770. doi: 10.1136/bmjopen-2021-055770 (PMC8705221; doi:10.1136/bmjopen-2021-055770), 2021-12-22
Supplement: bmjopen-2021-055770.draft_revisions.pdf [file bmjopen-2021-055770.draft_revisions.pdf]

# BMJ Open

BMJ Open is committed to open peer review. As part of this commitment we make the peer review history of every article we publish publicly available.

When an article is published we post the peer reviewers' comments and the authors' responses online. We also post the versions of the paper that were used during peer review. These are the versions that the peer review comments apply to.

The versions of the paper that follow are the versions that were submitted during the peer review process. They are not the versions of record or the final published versions. They should not be cited or distributed as the published version of this manuscript.

BMJ Open is an open access journal and the full, final, typeset and author-corrected version of record of the manuscript is available on our site with no access controls, subscription charges or pay-per-view fees (<http://bmjopen.bmj.com>).

If you have any questions on BMJ Open's open peer review process please email [info.bmjopen@bmj.com](mailto:info.bmjopen@bmj.com)

# BMJ Open

## Hyperkalemia prevalence, recurrence, and treatment in patients on haemodialysis in China: protocol for a prospective multicentre cohort study (PRECEDE-K)

|                               |                                                                                                                                                                                                                                                                                                                                                                                                                                                                                                                                                                                                                                                                                                                                                                                                                                                                                                                                                                                                                                                                                                                                                                                                                                                                                                                                                                                                                                                                                                                                                                                                                                                                                                                                                                                                                                               |
|-------------------------------|-----------------------------------------------------------------------------------------------------------------------------------------------------------------------------------------------------------------------------------------------------------------------------------------------------------------------------------------------------------------------------------------------------------------------------------------------------------------------------------------------------------------------------------------------------------------------------------------------------------------------------------------------------------------------------------------------------------------------------------------------------------------------------------------------------------------------------------------------------------------------------------------------------------------------------------------------------------------------------------------------------------------------------------------------------------------------------------------------------------------------------------------------------------------------------------------------------------------------------------------------------------------------------------------------------------------------------------------------------------------------------------------------------------------------------------------------------------------------------------------------------------------------------------------------------------------------------------------------------------------------------------------------------------------------------------------------------------------------------------------------------------------------------------------------------------------------------------------------|
| Journal:                      | <i>BMJ Open</i>                                                                                                                                                                                                                                                                                                                                                                                                                                                                                                                                                                                                                                                                                                                                                                                                                                                                                                                                                                                                                                                                                                                                                                                                                                                                                                                                                                                                                                                                                                                                                                                                                                                                                                                                                                                                                               |
| Manuscript ID                 | bmjopen-2021-055770                                                                                                                                                                                                                                                                                                                                                                                                                                                                                                                                                                                                                                                                                                                                                                                                                                                                                                                                                                                                                                                                                                                                                                                                                                                                                                                                                                                                                                                                                                                                                                                                                                                                                                                                                                                                                           |
| Article Type:                 | Protocol                                                                                                                                                                                                                                                                                                                                                                                                                                                                                                                                                                                                                                                                                                                                                                                                                                                                                                                                                                                                                                                                                                                                                                                                                                                                                                                                                                                                                                                                                                                                                                                                                                                                                                                                                                                                                                      |
| Date Submitted by the Author: | 26-Jul-2021                                                                                                                                                                                                                                                                                                                                                                                                                                                                                                                                                                                                                                                                                                                                                                                                                                                                                                                                                                                                                                                                                                                                                                                                                                                                                                                                                                                                                                                                                                                                                                                                                                                                                                                                                                                                                                   |
| Complete List of Authors:     | Ni, Zhaohui; Shanghai Jiao Tong University School of Medicine Affiliated Renji Hospital, Department of Nephrology, Jin, Haijiao; Shanghai Jiao Tong University School of Medicine Affiliated Renji Hospital, Department of Nephrology, Lu, Renhua; Shanghai Jiao Tong University School of Medicine Affiliated Renji Hospital, Department of Nephrology Zuo, Li; Peking University People's Hospital, Department of Nephrology Yu, Weimin; Shanxi Bethune Hospital, Department of Nephrology Wang, Junsheng; Nanjing Drum Tower Hospital, Department of Nephrology Wang, Rong; Shandong Provincial Hospital, Department of Nephrology Ren, Yuqing; Yangquan Coal Industry (Group) General Hospital, Department of Nephrology Yang, Qiongqiong; Sun Yat-Sen Memorial Hospital, Department of Nephrology Xiao, Jie; First Affiliated Hospital of Guangzhou Medical College, Department of Nephrology Zhang, Qinghong; Taihe Hospital, Department of Nephrology Zhang, Lihong; Hebei Medical University First Affiliated Hospital, Department of Nephrology Zhang, Xinzhou; Shenzhen People's Hospital, Department of Nephrology Qin, Qinkai; First Affiliated Hospital of Nanchang University, Department of Nephrology Chen, Chaosheng; The First Affiliated Hospital of Wenzhou Medical University, Department of Nephrology Shao, Guojian; Wenzhou Central Hospital, Department of Nephrology Luo, Qun; Ningbo No 2 Hospital, Department of Nephrology Yao, Li; China Medical University First Hospital, Department of Nephrology Qin, Shuguang; Guangzhou First People's Hospital, Department of Nephrology Peng, Hui ; Third Affiliated Hospital of Sun Yat-Sen University, Department of Nephrology Zhao, Qing; AstraZeneca Investment China Co Ltd, Medical Affairs Shang, Hongyan; AstraZeneca Investment China Co Ltd, Medical Affairs |
| Keywords:                     | Dialysis < NEPHROLOGY, End stage renal failure < NEPHROLOGY, EPIDEMIOLOGY                                                                                                                                                                                                                                                                                                                                                                                                                                                                                                                                                                                                                                                                                                                                                                                                                                                                                                                                                                                                                                                                                                                                                                                                                                                                                                                                                                                                                                                                                                                                                                                                                                                                                                                                                                     |

1  
2  
3  
4  
5  
6  
7  
8  
9  
10  
11  
12  
13  
14  
15  
16  
17  
18  
19  
20  
21  
22  
23  
24  
25  
26  
27  
28  
29  
30  
31  
32  
33  
34  
35  
36  
37  
38  
39  
40  
41  
42  
43  
44  
45  
46  
47  
48  
49  
50  
51  
52  
53  
54  
55  
56  
57  
58  
59  
60

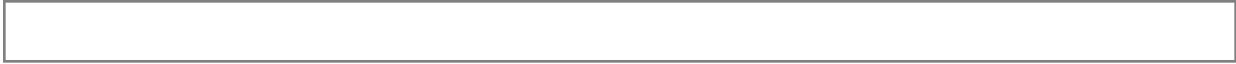

SCHOLARONE™  
Manuscripts

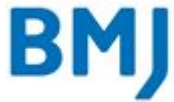

I, the Submitting Author has the right to grant and does grant on behalf of all authors of the Work (as defined in the below author licence), an exclusive licence and/or a non-exclusive licence for contributions from authors who are: i) UK Crown employees; ii) where BMJ has agreed a CC-BY licence shall apply, and/or iii) in accordance with the terms applicable for US Federal Government officers or employees acting as part of their official duties; on a worldwide, perpetual, irrevocable, royalty-free basis to BMJ Publishing Group Ltd ("BMJ") its licensees and where the relevant Journal is co-owned by BMJ to the co-owners of the Journal, to publish the Work in this journal and any other BMJ products and to exploit all rights, as set out in our [licence](#).

The Submitting Author accepts and understands that any supply made under these terms is made by BMJ to the Submitting Author unless you are acting as an employee on behalf of your employer or a postgraduate student of an affiliated institution which is paying any applicable article publishing charge ("APC") for Open Access articles. Where the Submitting Author wishes to make the Work available on an Open Access basis (and intends to pay the relevant APC), the terms of reuse of such Open Access shall be governed by a Creative Commons licence – details of these licences and which [Creative Commons](#) licence will apply to this Work are set out in our licence referred to above.

Other than as permitted in any relevant BMJ Author's Self Archiving Policies, I confirm this Work has not been accepted for publication elsewhere, is not being considered for publication elsewhere and does not duplicate material already published. I confirm all authors consent to publication of this Work and authorise the granting of this licence.

1  
2  
3  
4 **Hyperkalemia prevalence, recurrence, and treatment in patients on**  
5  
6 **haemodialysis in China: protocol for a prospective multicentre cohort study**  
7  
8  
9 **(PRECEDE-K )**  
10

11  
12 Zhaohui Ni<sup>1\*</sup>, Haijiao Jin<sup>1</sup>, Renhua Lu<sup>1</sup>, Li Zuo<sup>2</sup>, Weimin Yu<sup>3</sup>, Junsheng Wang<sup>4</sup>,  
13  
14 Rong Wang<sup>5</sup>, Yuqing Ren<sup>6</sup>, Qiongqiong Yang<sup>7</sup>, Jie Xiao<sup>8</sup>, Qinghong Zhang<sup>9</sup>, Lihong  
15  
16 Zhang<sup>10</sup>, Xinzhou Zhang<sup>11</sup>, Qinkai Chen<sup>12</sup>, Chaosheng Chen<sup>13</sup>, Guojian Shao<sup>14</sup>, Qun  
17  
18 Luo<sup>15</sup>, Li Yao<sup>16</sup>, Shuguang Qin<sup>17</sup>, Hui Peng<sup>18</sup>, Qing Zhao<sup>19</sup>, Hongyan Shang<sup>19</sup>, and the  
19  
20 PRECEDE-K study group  
21  
22  
23  
24  
25  
26  
27

28 <sup>1</sup>Department of Nephrology, Renji Hospital, School of Medicine, Shanghai Jiaotong  
29  
30 University, Shanghai, China.  
31

32  
33 <sup>2</sup>Department of Nephrology, Peking University People's Hospital, Beijing, China.  
34

35  
36 <sup>3</sup>Department of Nephrology, Shanxi Bethune Hospital, Taiyuan, China.  
37

38  
39 <sup>4</sup>Department of Nephrology, Suqian People's Hospital of Nanjing Drum-Tower  
40  
41 Hospital Group, Suqian, China.  
42

43  
44 <sup>5</sup>Department of Nephrology, Shandong Provincial Hospital, Jinan, China.  
45

46  
47 <sup>6</sup>Department of Nephrology, Yangquan Coal Industry (Group) General Hospital,  
48  
49 Yangquan, China.  
50

51  
52 <sup>7</sup>Department of Nephrology, Sun Yat-sen Memorial Hospital, Sun Yat-sen University,  
53  
54 Guangzhou, China.  
55

56  
57 <sup>8</sup>Department of Nephrology, The First Affiliated Hospital of Guangzhou Medical  
58  
59 University, Guangzhou, China.  
60

1  
2  
3  
4<sup>9</sup>Department of Nephrology, Taihe Hospital of Shiyuan City, Shiyuan, China.  
5

6  
7<sup>10</sup>Department of Nephrology, The First Hospital of Hebei Medical University,  
8  
9 Shijiazhuang, China.  
10

11<sup>11</sup>Department of Nephrology, Shenzhen People's Hospital, Shenzhen, China.  
12

13  
14<sup>12</sup>Department of Nephrology, The First Affiliated Hospital of Nanchang University,  
15  
16 Nanchang, China.  
17

18  
19  
20<sup>13</sup>Department of Nephrology, The First Affiliated Hospital of Wenzhou Medical  
21  
22 University, Wenzhou, China.  
23

24  
25<sup>14</sup>Department of Nephrology, Wenzhou Central Hospital, Wenzhou, China.  
26

27  
28<sup>15</sup>Department of Nephrology, Ningbo No.2 Hospital, Ningbo, China.  
29

30  
31<sup>16</sup>Department of Nephrology, The First Affiliated Hospital of China Medical  
32  
33 University, Shenyang, China.  
34

35  
36<sup>17</sup>Department of Nephrology, Guangzhou First People's Hospital, Guangzhou, China.  
37

38  
39<sup>18</sup>Department of Nephrology, The Third Affiliated Hospital of Sun Yat-sen  
40  
41 University, Guangzhou, China.  
42

43  
44<sup>19</sup>Department of Medical Affaires, AstraZeneca Investment China Co Ltd, Shanghai,  
45  
46 China.  
47

48  
49  
50  
51 \*Corresponding author: Zhaohui Ni

52 Email profnizh@126.com

53  
54 Dongfang Road 1630, Shanghai, China

55  
56 Phone: 86 02168383121

57  
58 Fax: 86 02168383834  
59  
60

## ABSTRACT

### Introduction

Hyperkalemia (HK) is a potentially life-threatening electrolyte imbalance associated with several adverse clinical outcomes and is common in patients with kidney failure.

However, there is no evidence on the occurrence, recurrence, and treatment of HK in patients on hemodialysis (HD) in China.

**Methods and analysis** The HK Prevalence, Recurrence, and Treatment in Haemodialysis Trial (PRECEDE-K; NCT04799067) is a prospective, multicenter, observational, cohort study being conducted across 15-18 sites in China. Approximately 600 patients with end-stage kidney disease on HD are anticipated to be enrolled and will be followed up for 24 weeks. Patients will be in the long interdialytic interval (LIDI) at enrollment and will receive follow-up care every 4 weeks in LIDI for pre-dialysis and post-dialysis (at enrollment only) serum potassium measurements. To obtain pre-dialysis serum potassium levels in the short interdialytic interval (SIDI), a follow-up visit will be performed in the SIDI during the first week. Information on concomitant medications, blood gas analysis, and biochemistry measurements will be obtained at enrollment and at each follow-up visit. The primary endpoint will be the proportion of patients experiencing HK (defined as serum potassium level  $>5.0$  mmol/L) at the study enrollment or during the 24-week follow-up. The key secondary endpoint will be the proportion of patients experiencing HK recurrence (defined as any HK event after the first HK event) within 1 to 6 months (if applicable) during a 24-week follow-

up, including enrollment assessment.

### **Ethics and dissemination**

This trial has been approved by Shanghai Jiaotong University School of Medicine, Renji Hospital Ethics Committee (2020-040). The findings of this study will be disseminated through peer-reviewed publications and conference presentations.

**Key words:** dialysis, end-stage renal failure, epidemiology

### **Article summary**

#### **Strengths and limitations**

- The PRECEDE-K trial will be the first prospective multicentre cohort study with a large sample on the prevalence, recurrence, and treatment pattern of HK in patients with HD in China.
- The PRECEDE-K trial will providing high-quality evidence and meaningful insights for guiding physicians in to clinical practice.
- However, the PRECEDE-K trial will not analyze neither the prognosis nor the impact on cardiovascular events of HK.

### **Background**

The prevalence of end-stage renal disease (ESRD) is on the rise globally. In 2010, 2.618 million patients with ESRD received renal replacement therapy (RRT) worldwide and its use is projected to be more than double by 2030, with the highest prevalence in Asia.<sup>[1]</sup> Hemodialysis (HD) is the dominant treatment modality for those who are under RRT in China. According to the Report of Chinese National Renal Data System



1  
2  
3  
4 (CNRDS) in 2018, there were >1.3 million patients with ESRD in China, among whom  
5  
6 there were 580,000 patients who were on HD.  
7

8  
9 Hyperkalemia (HK) is a potentially life-threatening electrolyte imbalance,  
10 typically defined as a serum potassium concentration >5.0 mmol/L<sup>[2]</sup>. Due to its  
11 detrimental effects on cardiac electrophysiology and neuromuscular function, HK has  
12  
13  
14  
15  
16  
17  
18  
19  
20  
21  
22  
23  
24  
25  
26  
27  
28  
29  
30  
31  
32  
33  
34  
35  
36  
37  
38  
39  
40  
41  
42  
43  
44  
45  
46  
47  
48  
49  
50  
51  
52  
53  
54  
55  
56  
57  
58  
59  
60  
61  
62  
63  
64  
65  
66  
67  
68  
69  
70  
71  
72  
73  
74  
75  
76  
77  
78  
79  
80  
81  
82  
83  
84  
85  
86  
87  
88  
89  
90  
91  
92  
93  
94  
95  
96  
97  
98  
99  
100  
101  
102  
103  
104  
105  
106  
107  
108  
109  
110  
111  
112  
113  
114  
115  
116  
117  
118  
119  
120  
121  
122  
123  
124  
125  
126  
127  
128  
129  
130  
131  
132  
133  
134  
135  
136  
137  
138  
139  
140  
141  
142  
143  
144  
145  
146  
147  
148  
149  
150  
151  
152  
153  
154  
155  
156  
157  
158  
159  
160  
161  
162  
163  
164  
165  
166  
167  
168  
169  
170  
171  
172  
173  
174  
175  
176  
177  
178  
179  
180  
181  
182  
183  
184  
185  
186  
187  
188  
189  
190  
191  
192  
193  
194  
195  
196  
197  
198  
199  
200  
201  
202  
203  
204  
205  
206  
207  
208  
209  
210  
211  
212  
213  
214  
215  
216  
217  
218  
219  
220  
221  
222  
223  
224  
225  
226  
227  
228  
229  
230  
231  
232  
233  
234  
235  
236  
237  
238  
239  
240  
241  
242  
243  
244  
245  
246  
247  
248  
249  
250  
251  
252  
253  
254  
255  
256  
257  
258  
259  
260  
261  
262  
263  
264  
265  
266  
267  
268  
269  
270  
271  
272  
273  
274  
275  
276  
277  
278  
279  
280  
281  
282  
283  
284  
285  
286  
287  
288  
289  
290  
291  
292  
293  
294  
295  
296  
297  
298  
299  
300  
301  
302  
303  
304  
305  
306  
307  
308  
309  
310  
311  
312  
313  
314  
315  
316  
317  
318  
319  
320  
321  
322  
323  
324  
325  
326  
327  
328  
329  
330  
331  
332  
333  
334  
335  
336  
337  
338  
339  
340  
341  
342  
343  
344  
345  
346  
347  
348  
349  
350  
351  
352  
353  
354  
355  
356  
357  
358  
359  
360  
361  
362  
363  
364  
365  
366  
367  
368  
369  
370  
371  
372  
373  
374  
375  
376  
377  
378  
379  
380  
381  
382  
383  
384  
385  
386  
387  
388  
389  
390  
391  
392  
393  
394  
395  
396  
397  
398  
399  
400  
401  
402  
403  
404  
405  
406  
407  
408  
409  
410  
411  
412  
413  
414  
415  
416  
417  
418  
419  
420  
421  
422  
423  
424  
425  
426  
427  
428  
429  
430  
431  
432  
433  
434  
435  
436  
437  
438  
439  
440  
441  
442  
443  
444  
445  
446  
447  
448  
449  
450  
451  
452  
453  
454  
455  
456  
457  
458  
459  
460  
461  
462  
463  
464  
465  
466  
467  
468  
469  
470  
471  
472  
473  
474  
475  
476  
477  
478  
479  
480  
481  
482  
483  
484  
485  
486  
487  
488  
489  
490  
491  
492  
493  
494  
495  
496  
497  
498  
499  
500  
501  
502  
503  
504  
505  
506  
507  
508  
509  
510  
511  
512  
513  
514  
515  
516  
517  
518  
519  
520  
521  
522  
523  
524  
525  
526  
527  
528  
529  
530  
531  
532  
533  
534  
535  
536  
537  
538  
539  
540  
541  
542  
543  
544  
545  
546  
547  
548  
549  
550  
551  
552  
553  
554  
555  
556  
557  
558  
559  
560  
561  
562  
563  
564  
565  
566  
567  
568  
569  
570  
571  
572  
573  
574  
575  
576  
577  
578  
579  
580  
581  
582  
583  
584  
585  
586  
587  
588  
589  
590  
591  
592  
593  
594  
595  
596  
597  
598  
599  
600  
601  
602  
603  
604  
605  
606  
607  
608  
609  
610  
611  
612  
613  
614  
615  
616  
617  
618  
619  
620  
621  
622  
623  
624  
625  
626  
627  
628  
629  
630  
631  
632  
633  
634  
635  
636  
637  
638  
639  
640  
641  
642  
643  
644  
645  
646  
647  
648  
649  
650  
651  
652  
653  
654  
655  
656  
657  
658  
659  
660  
661  
662  
663  
664  
665  
666  
667  
668  
669  
670  
671  
672  
673  
674  
675  
676  
677  
678  
679  
680  
681  
682  
683  
684  
685  
686  
687  
688  
689  
690  
691  
692  
693  
694  
695  
696  
697  
698  
699  
700  
701  
702  
703  
704  
705  
706  
707  
708  
709  
710  
711  
712  
713  
714  
715  
716  
717  
718  
719  
720  
721  
722  
723  
724  
725  
726  
727  
728  
729  
730  
731  
732  
733  
734  
735  
736  
737  
738  
739  
740  
741  
742  
743  
744  
745  
746  
747  
748  
749  
750  
751  
752  
753  
754  
755  
756  
757  
758  
759  
760  
761  
762  
763  
764  
765  
766  
767  
768  
769  
770  
771  
772  
773  
774  
775  
776  
777  
778  
779  
780  
781  
782  
783  
784  
785  
786  
787  
788  
789  
790  
791  
792  
793  
794  
795  
796  
797  
798  
799  
800  
801  
802  
803  
804  
805  
806  
807  
808  
809  
810  
811  
812  
813  
814  
815  
816  
817  
818  
819  
820  
821  
822  
823  
824  
825  
826  
827  
828  
829  
830  
831  
832  
833  
834  
835  
836  
837  
838  
839  
840  
841  
842  
843  
844  
845  
846  
847  
848  
849  
850  
851  
852  
853  
854  
855  
856  
857  
858  
859  
860  
861  
862  
863  
864  
865  
866  
867  
868  
869  
870  
871  
872  
873  
874  
875  
876  
877  
878  
879  
880  
881  
882  
883  
884  
885  
886  
887  
888  
889  
890  
891  
892  
893  
894  
895  
896  
897  
898  
899  
900  
901  
902  
903  
904  
905  
906  
907  
908  
909  
910  
911  
912  
913  
914  
915  
916  
917  
918  
919  
920  
921  
922  
923  
924  
925  
926  
927  
928  
929  
930  
931  
932  
933  
934  
935  
936  
937  
938  
939  
940  
941  
942  
943  
944  
945  
946  
947  
948  
949  
950  
951  
952  
953  
954  
955  
956  
957  
958  
959  
960  
961  
962  
963  
964  
965  
966  
967  
968  
969  
970  
971  
972  
973  
974  
975  
976  
977  
978  
979  
980  
981  
982  
983  
984  
985  
986  
987  
988  
989  
990  
991  
992  
993  
994  
995  
996  
997  
998  
999  
1000

Besides, abnormalities of potassium, rapid changes in potassium concentrations during the HD session have been suggested as a potential cause of cardiac arrhythmia.<sup>[10-13]</sup>

43 However, there is no evidence on the occurrence, recurrence, and the treatment of  
44  
45  
46  
47  
48  
49  
50  
51  
52  
53  
54  
55  
56  
57  
58  
59  
60  
61  
62  
63  
64  
65  
66  
67  
68  
69  
70  
71  
72  
73  
74  
75  
76  
77  
78  
79  
80  
81  
82  
83  
84  
85  
86  
87  
88  
89  
90  
91  
92  
93  
94  
95  
96  
97  
98  
99  
100  
101  
102  
103  
104  
105  
106  
107  
108  
109  
110  
111  
112  
113  
114  
115  
116  
117  
118  
119  
120  
121  
122  
123  
124  
125  
126  
127  
128  
129  
130  
131  
132  
133  
134  
135  
136  
137  
138  
139  
140  
141  
142  
143  
144  
145  
146  
147  
148  
149  
150  
151  
152  
153  
154  
155  
156  
157  
158  
159  
160  
161  
162  
163  
164  
165  
166  
167  
168  
169  
170  
171  
172  
173  
174  
175  
176  
177  
178  
179  
180  
181  
182  
183  
184  
185  
186  
187  
188  
189  
190  
191  
192  
193  
194  
195  
196  
197  
198  
199  
200  
201  
202  
203  
204  
205  
206  
207  
208  
209  
210  
211  
212  
213  
214  
215  
216  
217  
218  
219  
220  
221  
222  
223  
224  
225  
226  
227  
228  
229  
230  
231  
232  
233  
234  
235  
236  
237  
238  
239  
240  
241  
242  
243  
244  
245  
246  
247  
248  
249  
250  
251  
252  
253  
254  
255  
256  
257  
258  
259  
260  
261  
262  
263  
264  
265  
266  
267  
268  
269  
270  
271  
272  
273  
274  
275  
276  
277  
278  
279  
280  
281  
282  
283  
284  
285  
286  
287  
288  
289  
290  
291  
292  
293  
294  
295  
296  
297  
298  
299  
300  
301  
302  
303  
304  
305  
306  
307  
308  
309  
310  
311  
312  
313  
314  
315  
316  
317  
318  
319  
320  
321  
322  
323  
324  
325  
326  
327  
328  
329  
330  
331  
332  
333  
334  
335  
336  
337  
338  
339  
340  
341  
342  
343  
344  
345  
346  
347  
348  
349  
350  
351  
352  
353  
354  
355  
356  
357  
358  
359  
360  
361  
362  
363  
364  
365  
366  
367  
368  
369  
370  
371  
372  
373  
374  
375  
376  
377  
378  
379  
380  
381  
382  
383  
384  
385  
386  
387  
388  
389  
390  
391  
392  
393  
394  
395  
396  
397  
398  
399  
400  
401  
402  
403  
404  
405  
406  
407  
408  
409  
410  
411  
412  
413  
414  
415  
416  
417  
418  
419  
420  
421  
422  
423  
424  
425  
426  
427  
428  
429  
430  
431  
432  
433  
434  
435  
436  
437  
438  
439  
440  
441  
442  
443  
444  
445  
446  
447  
448  
449  
450  
451  
452  
453  
454  
455  
456  
457  
458  
459  
460  
461  
462  
463  
464  
465  
466  
467  
468  
469  
470  
471  
472  
473  
474  
475  
476  
477  
478  
479  
480  
481  
482  
483  
484  
485  
486  
487  
488  
489  
490  
491  
492  
493  
494  
495  
496  
497  
498  
499  
500  
501  
502  
503  
504  
505  
506  
507  
508  
509  
510  
511  
512  
513  
514  
515  
516  
517  
518  
519  
520  
521  
522  
523  
524  
525  
526  
527  
528  
529  
530  
531  
532  
533  
534  
535  
536  
537  
538  
539  
540  
541  
542  
543  
544  
545  
546  
547  
548  
549  
550  
551  
552  
553  
554  
555  
556  
557  
558  
559  
560  
561  
562  
563  
564  
565  
566  
567  
568  
569  
570  
571  
572  
573  
574  
575  
576  
577  
578  
579  
580  
581  
582  
583  
584  
585  
586  
587  
588  
589  
590  
591  
592  
593  
594  
595  
596  
597  
598  
599  
600  
601  
602  
603  
604  
605  
606  
607  
608  
609  
610  
611  
612  
613  
614  
615  
616  
617  
618  
619  
620  
621  
622  
623  
624  
625  
626  
627  
628  
629  
630  
631  
632  
633  
634  
635  
636  
637  
638  
639  
640  
641  
642  
643  
644  
645  
646  
647  
648  
649  
650  
651  
652  
653  
654  
655  
656  
657  
658  
659  
660  
661  
662  
663  
664  
665  
666  
667  
668  
669  
670  
671  
672  
673  
674  
675  
676  
677  
678  
679  
680  
681  
682  
683  
684  
685  
686  
687  
688  
689  
690  
691  
692  
693  
694  
695  
696  
697  
698  
699  
700  
701  
702  
703  
704  
705  
706  
707  
708  
709  
710  
711  
712  
713  
714  
715  
716  
717  
718  
719  
720  
721  
722  
723  
724  
725  
726  
727  
728  
729  
730  
731  
732  
733  
734  
735  
736  
737  
738  
739  
740  
741  
742  
743  
744  
745  
746  
747  
748  
749  
750  
751  
752  
753  
754  
755  
756  
757  
758  
759  
760  
761  
762  
763  
764  
765  
766  
767  
768  
769  
770  
771  
772  
773  
774  
775  
776  
777  
778  
779  
780  
781  
782  
783  
784  
785  
786  
787  
788  
789  
790  
791  
792  
793  
794  
795  
796  
797  
798  
799  
800  
801  
802  
803  
804  
805  
806  
807  
808  
809  
810  
811  
812  
813  
814  
815  
816  
817  
818  
819  
820  
821  
822  
823  
824  
825  
826  
827  
828  
829  
830  
831  
832  
833  
834  
835  
836  
837  
838  
839  
840  
841  
842  
843  
844  
845  
846  
847  
848  
849  
850  
851  
852  
853  
854  
855  
856  
857  
858  
859  
860  
861  
862  
863  
864  
865  
866  
867  
868  
869  
870  
871  
872  
873  
874  
875  
876  
877  
878  
879  
880  
881  
882  
883  
884  
885  
886  
887  
888  
889  
890  
891  
892  
893  
894  
895  
896  
897  
898  
899  
900  
901  
902  
903  
904  
905  
906  
907  
908  
909  
910  
911  
912  
913  
914  
915  
916  
917  
918  
919  
920  
921  
922  
923  
924  
925  
926  
927  
928  
929  
930  
931  
932  
933  
934  
935  
936  
937  
938  
939  
940  
941  
942  
943  
944  
945  
946  
947  
948  
949  
950  
951  
952  
953  
954  
955  
956  
957  
958  
959  
960  
961  
962  
963  
964  
965  
966  
967  
968  
969  
970  
971  
972  
973  
974  
975  
976  
977  
978  
979  
980  
981  
982  
983  
984  
985  
986  
987  
988  
989  
990  
991  
992  
993  
994  
995  
996  
997  
998  
999  
1000

However, there is no evidence on the occurrence, recurrence, and the treatment of HK in patients undergoing HD in China. Meanwhile, there is no Chinese guidelines on HK management in patients undergoing HD. In the present study, we aimed to evaluate the prevalence and recurrence of HK in Chinese patients on HD and to understand the treatment pattern of HK in China.

## Methods

## *Design*

This is a prospective, observational, cohort study, which was registered with the ClinicalTrials.gov prior to initiation of patient enrollment (ClinicalTrials.gov identifiers: NCT04799067; Version 1.0; Date 12 Oct, 2020).

Patients will be in long interdialytic interval (LIDI) at enrollment visit 1 (V1). Demographic characteristics, medical history, etiology of ESRD, concomitant medications, dialysis vintage, an electrocardiogram, a pre-dialysis K<sup>+</sup> measurement and a post-dialysis K<sup>+</sup> measurement, blood routine, blood gas analysis, and other blood biochemistry measurements will be obtained. Potassium measurements, including pre-dialysis potassium measurements at the LIDI once every month (V3-V8), pre-dialysis potassium at short interdialytic interval (SIDI) during the first week (V2) for patients in HD thrice a week specifically, will be performed. Information on concomitant medications, blood routine, blood gas analysis, and other blood biochemistry measurements will also be obtained.

LIDI is defined as the interval between dialysis  $\geq 2$  days, while SIDI is defined as the 1-day interval between dialysis. For patients receiving HD thrice weekly, there will be one LIDI and two SIDI every week. For patients receiving HD twice a week, there will be two LIDIs every week.

The illustration of the proposed study design is shown in Figure 1 (patient on HD thrice a week as an example). The detailed study plan of the PRECEDE-K trial is shown in Table 1.

**Figure 1.** The study design of the PRECEDE-K trial

\*For patients receiving HD thrice a week, V2 could be at D3 or D5 for collecting pre-dialytic serum potassium at SIDI. For patients receiving HD twice a week, visit 2 will be waived as there is no SIDI for these patients; thus, there are 7 visits in total.

\*\*Time window is  $\pm 1$  week.

d, day; ESRD, end-stage renal disease; LIDI, long interdialytic interval; SIDI, short interdialytic interval; V, visit; w, week

**Table 1.** The Study Plan of the PRECEDE-K Trial

|                                              | Visit 1      | Visit 2                     | Visit 3-8                     |
|----------------------------------------------|--------------|-----------------------------|-------------------------------|
|                                              | 1d<br>(LIDI) | 3/5d<br><sup>a</sup> (SIDI) | 4-24 w <sup>b</sup><br>(LIDI) |
| ICF                                          | X            |                             |                               |
| Screen inclusion and exclusion criteria      | X            |                             |                               |
| Demographic characteristics                  | X            |                             |                               |
| Medical history                              | X            |                             |                               |
| Etiology of ESRD                             | X            |                             |                               |
| Vascular access                              | X            |                             | X                             |
| Height (cm)                                  | X            |                             |                               |
| Pre-dialysis weight (kg)                     | X            | X                           | X                             |
| Post-dialysis weight (kg)                    | X            | X                           | X                             |
| Vital signs                                  | X            | X                           | X                             |
| Physical examination                         | X            | X                           | X                             |
| Pre-dialysis serum K <sup>+</sup> c mEq/L    | X            | X                           | X                             |
| Post-dialysis serum K <sup>+</sup> c mEq/L   | X            |                             | X*                            |
| Dialysis adequacy <sup>d</sup>               | X            |                             | Evaluated at week 12          |
| Dialysis frequency                           | X            |                             | X                             |
| Dialysis prescription                        | X            |                             | X                             |
| ECG <sup>e</sup>                             | X            |                             | X*                            |
| Echocardiography <sup>f</sup>                | X*           |                             | X*                            |
| Urine 24-hour volume (litres) <sup>g</sup>   |              |                             | Evaluated at week 4 or week 8 |
| Urine biochemistry measurements <sup>g</sup> |              |                             | Evaluated at week 4 or week 8 |
| Blood routine                                | X            |                             | X                             |
| Biochemistry measurements                    | X            |                             | X                             |
| Blood gas analysis                           | X            |                             | X                             |
| Concomitant medication                       | X            | X                           | X                             |

Vital signs, physical examination, pre-dialysis K<sup>+</sup>, pre-dialysis weight, blood routine, biochemistry measurements should be collected within 30 minutes before initiation of HD. Post-dialysis weight, post-dialysis K<sup>+</sup> and post-dialysis BUN should be collected within 30 minutes after HD procedure.

1  
2  
3 All blood samples will be measured at local laboratory.  
4  
5 d, day; ECG, electrocardiogram; ESRD, end-stage renal disease; ICF, intracellular fluid; LIDI, long  
6 interdialytic interval; SIDI, short interdialytic interval; w, week;  
7  
8

9 <sup>a</sup>For patients receiving HD thrice a week, there are 2 SIDI in an HD section, so visit 2 can be on day 3  
10 or day 5. For patients receiving HD twice a week, visit 2 will be waived, as there is no SIDI for these  
11 patients.  
12

13 <sup>b</sup>Time window is  $\pm 1$  week.

14 <sup>c</sup>Blood samples for the determination of pre-dialysis serum K<sup>+</sup> concentration and post-dialysis serum K<sup>+</sup>  
15 concentration will be drawn before and after the HD procedure according to the routine clinical practice.  
16

17 <sup>d</sup>Dialysis adequacy will be evaluated by URR. . To calculate the URR, post-dialysis BUN will be tested  
18 on day 1 and week 12.  
19

20 <sup>e</sup>ECG: evaluated within 1 day before or after the enrollment in principle; allow individual adjustments in  
21 each center. All ECGs during the follow-up should be recorded in eCRF. For patients who experience  
22 HK during the study period, it is recommended to conduct at least one more pre-dialysis ECG at LIDI.  
23

24 <sup>f</sup>Echocardiography: evaluated echocardiography data if it is conducted within 2 weeks before or after  
25 visits in principle; allow individual adjustments in each center.  
26

27 <sup>g</sup>Urine will be collected for a period of 24 hours at either week 4 or week 8. The volume and biochemistry  
28 measurements of the 24-hour urine sample will be measured.  
29  
30  
31  
32  
33  
34

### 35 ***Study sites and period***

36  
37 This study will utilize primary data collected by investigators from approximately 15-  
38 18 sites in China. Patients with ESRD on HD treatment will be enrolled and will be  
39 followed up for 24 weeks.  
40  
41  
42  
43  
44

### 45 ***Population***

46  
47 This study will include approximately 600 patients with ESRD (aged  $\geq 18$  years)  
48 receiving HD treatment twice a week or thrice a week. Patients will be eligible to be  
49 included in the study only if all of the following criteria are applicable: (1) patients are  
50 aged  $\geq 18$  years at the time of signing the informed consent; (2) patients with ESRD and  
51 on HD; (3) the HD treatment frequency is  $\geq 2$  sessions per week; (4) capable of giving  
52  
53  
54  
55  
56  
57  
58  
59  
60

signed informed consent.

Patients will be excluded from the study if any of the following criteria are applicable:

(1) acute kidney injury; (2) expected to receive renal transplantation within 6 months; (3) intracranial hemorrhage or elevated intracranial pressure within 1 month before enrollment; (4) a traumatic experience that cannot be corrected by drugs within 1 month before enrollment; (5) failure to establish vascular access; (6) has been receiving peritoneal dialysis; (7) not suitable for this study as judged by the investigators

### ***Procedures for Withdrawal/Discontinuation***

Eligible patients will be followed for up to 24 weeks, or up till occurrence of any of following events, whichever occurred earlier.

1. Death
2. End of study period
3. Loss to follow-up: defined as transfer to HD centre(s) not in this study, or refused to continue follow-up, or cannot be contacted by phone calls for three times
4. Change modality of RRT (peritoneal dialysis or renal transplantation)
5. Withdrawal of ICF
6. Investigators consider it necessary for the subjects to terminate the study

### ***Primary outcome***

The primary outcome will be proportion of patients experiencing HK (defined as serum potassium levels  $>5.0$  mmol/L) at the study enrollment or during a 24-week follow-up.

### ***Secondary outcomes***

- The proportion of patients experiencing HK recurrence (defined as any HK event after the first HK event) within 1, 2, 3, 4, 5, or 6 months (if applicable) during a 24-week follow-up including the enrollment assessment. An HK event is defined as

1  
2  
3  
4 any serum K<sup>+</sup> concentration >5.0 mmol/L within an interdialytic interval, which is  
5  
6 usually 2 to 3 days.  
7

- 8  
9  
10 • The proportion of patients with 2, 3, 4, 5, and ≥6 events of HK during a 24-week  
11 follow-up including the enrollment assessment.  
12  
13  
14 • Intradialytic potassium shift (defined as the difference between pre- and post-  
15 dialysis K<sup>+</sup> concentration) at LIDI during the first week after patient enrollment  
16  
17  
18 • Serum K<sup>+</sup> concentration at LIDI and SIDI in patients receiving HD thrice a week  
19 during the first week after patient enrollment.  
20  
21  
22  
23  
24 • The proportion of patients with HK treated with any potassium binders including  
25 sodium polystyrene sulfonate (SPS), calcium polystyrene sulfonate (CPS), or  
26 sodium zirconium cyclosilicate (SZC), and specific proportion of each potassium  
27 binder, respectively, during the 24-week follow-up period.  
28  
29  
30  
31  
32  
33  
34  
35 • The proportion of HK events treated with any potassium binders including SPS,  
36 CPS, or SZC among total number of HK events during the 24-week follow-up  
37 period.  
38  
39  
40  
41  
42  
43 • Mean daily dose of SPS, CPS, or SZC in patients treated with any potassium binder.  
44  
45  
46 • Duration of the treatment of SPS, CPS, or SZC in patients treated with any  
47 potassium binders.  
48  
49  
50  
51  
52

### 53 *Exploratory endpoints*

- 54  
55  
56 • Risk factors for experiencing any HK (defined as serum potassium level >5.0  
57 mmol/L) at the study enrollment or during a 24-week follow-up.  
58  
59  
60

- Risk factors for experiencing HK recurrence during a 24-week follow-up.

### ***Statistical analysis principles***

Statistical methods will be primarily descriptive in nature. For categorical data, the frequency and percentage of patients in each category will be presented. Percentages will be based on non-missing data unless otherwise specified. For continuous data, descriptive statistics will be presented as the number of patients (n), mean, standard deviation (SD), median, minimum and maximum. All successfully enrolled subjects fulfilling inclusion/exclusion criteria will be included in the Full Analysis Set (FAS), which will be the primary analysis set for all primary and secondary analyses unless specified otherwise.

### ***Primary analysis***

The proportion of patents experiencing any HK at the study enrollment or during a 24-week follow-up will be presented by the percentage as well as its 95% confidence interval. HK is defined as  $K^+ > 5.0$  mmol/L while the same summary will be generated using a higher threshold of HK as  $K^+ > 5.5$  mmol/L as well, as sensitivity analysis. The proportion of patients experiencing serum  $K^+$  concentration  $> 6.0$  mmol/L, 6.5 mmol/L, 7.0 mmol/L, and 7.5 mmol/L will be reported as well.

### ***Secondary analysis***

1. The proportion of HK recurrence within 1, 2, 3, 4, 5, or 6 month(s) after the first HK

1  
2  
3  
4 and the proportions of patients with 2, 3, 4, 5, and  $\geq 6$  times of HK events during the 24-  
5  
6 week follow-up will be presented using the percentage and its 95% confidence interval.  
7

8  
9 The HK recurrence is defined as any consecutive HK events. An HK event is defined  
10  
11 as any serum  $K^+$  concentration  $>5.0$  mmol/L within an interdialytic interval, which is  
12  
13 usually 2 to 3 days. A higher threshold of HK event as serum  $K^+$  concentration  $>5.5$   
14  
15 mmol/L will be utilized to generate similar summaries, as sensitivity analyses.  
16  
17

18  
19  
20  
21 2. Intradialytic potassium shift is evaluated by the mean difference between pre- and  
22  
23 post-dialysis serum  $K^+$  concentration during the first week after patient enrollment. If  
24  
25 there are more than one serum  $K^+$  concentrations before or after HD, intradialytic  
26  
27 potassium shift will be the difference between the last serum  $K^+$  concentration  
28  
29 measurement before HD and the first serum  $K^+$  measurement after HD. Summary  
30  
31 statistics will be provided using mean, median, SD, minimum, and maximum. The  
32  
33 number of subjects and the missing number of subjects will also be presented.  
34  
35  
36  
37

38  
39  
40 3. Serum  $K^+$  concentration at LIDI and SIDI as well as the difference between LIDI and  
41  
42 SIDI during the first week after patient enrollment will summarized with the same  
43  
44 method as described above. This analysis will only be applicable on patients receiving  
45  
46 HD thrice a week. LIDI is defined as the interval between dialysis ( $\geq 2$  days), whereas  
47  
48 SIDI is defined as the 1-day interval between dialysis.  
49  
50  
51

52  
53  
54 4. Treatment pattern for HK with potassium binders will be assessed by: the proportion  
55  
56 of HK patients treated with any potassium binders including SPS or CPS or SZC during  
57  
58 the 24-week follow-up period. The proportion of patients with HK treated with specific  
59  
60



1  
2  
3  
4 potassium binder including SPS, CPS, and SZC, respectively, during the 24-week  
5  
6 follow-up period; the proportion of HK events treated with any potassium binders  
7  
8 including SPS, CPS, or SZC among total number of HK events during the 24-week  
9  
10 follow-up period; the mean daily dose of SPS, CPS, or SZC in patients treated with any  
11  
12 potassium binder; the duration of the treatment of SPS, CPS, or SZC in patients treated  
13  
14 with any potassium binder, above the categorical and continuous variables will be  
15  
16 analyzed based on previously mentioned descriptive methods, as associated summary  
17  
18 statistics, will be presented. Where for proportion, the denominator will always be the  
19  
20 number of subjects in FAS.  
21  
22  
23  
24  
25  
26  
27

### 28 ***Exploratory analysis***

29  
30 Univariate and multivariate logistic regression will be used to explore the association  
31  
32 of risk factors with any HK occurrence and recurrence. HK occurrence is defined  
33  
34 similar to that mentioned in the primary analysis, where patients experience any HK  
35  
36 (defined as serum potassium  $>5.0$  mmol/L) at the study enrollment or during a 24-week  
37  
38 follow-up. The HK recurrence is defined similar to that mentioned in the secondary  
39  
40 analysis, where patients experienced any HK event after the first HK event will be  
41  
42 counted as with recurrence. An HK event is defined as any serum  $K^+$  concentration  $>5.0$   
43  
44 mmol/L within an interdialytic interval, which is usually 2 to 3 days. Risk factors  
45  
46 including dialysis frequency, dialysate potassium, dialysis vintage, treatment of HK,  
47  
48 medical history of special interest, including history of atherosclerotic heart disease,  
49  
50 congestive heart failure, diabetes, hypertension, dialysis adequacy (URR), urine  
51  
52 volume, and so on. Odds ratio and 95% confidence interval estimation of each risk  
53  
54  
55  
56  
57  
58  
59  
60

factor (both un-adjusted and adjusted) will be presented with 2-sided *P*-value provided.

### ***Sample size and power calculations***

The primary endpoint will be the proportion of patients experiencing HK anytime at enrollment and during a 24-week follow-up, the previously reported proportion of patients experiencing HK is 73.8% during a 2-year follow-up<sup>[9]</sup> and 58% during a 4-month follow-up.<sup>[11]</sup> In this study, an assumption is made that the proportion of patients experiencing HK will be between 58% and 73.8% during a 24-week follow-up. Precision estimates for primary endpoint under different sample sizes are presented in table 2. We assumed that 600 patients will provide a precision (half width of 95% confidence interval) estimate of 3.5% to 3.9%.

**Table 2.** Precision estimates for primary endpoint under different sample sizes

| HK Proportion | Sample Size | Precision | 95% Confidence Interval Estimate |
|---------------|-------------|-----------|----------------------------------|
| 58.0%         | 600         | 3.90%     | [54.1%, 61.9%]                   |
| 73.8%         | 600         | 3.50%     | [70.3%, 77.3%]                   |

HK, hyperkalemia

### **Data statement**

All Data will be collected and entered into the electronic case report form (eCRF). The investigator will be responsible for ensuring that the required data is collected and entered into the eCRF.

### **Ethics and dissemination**

This trial has been approved by Shanghai Jiaotong University School of Medicine, Renji Hospital Ethics Committee (2020-040). Other participating sub-centers must also

1  
2  
3  
4 obtain ethics committee approval documents prior to the start of clinical trials. The  
5  
6 Good Clinical Practice(GCP) regulations shall be strictly followed during the test  
7  
8 implementation. This trial has been registered with the Chinese Clinical Trial Registry  
9  
10 (<http://www.chictr.org.cn/index.aspx>) at 22 Jan. 2020. Amendments to the protocol will  
11  
12 be reviewed by Ethics Committees. Informed consent will be obtained before collecting  
13  
14 any patient data and patient information. The findings of this study will be disseminated  
15  
16 through peer-reviewed publications and conference presentations.  
17  
18  
19  
20  
21  
22  
23  
24

### 25 **Quality Control**

26 The activities for quality control could include but are not limited to:

#### 27 ***Contacts with the sites to***

- 28 • Provide information and support to the investigator(s)
- 29 • Confirm that the research team is complying with the protocol and that data are  
30 being accurately recorded in the eCRFs
- 31 • Ensure that the subject ICFs are signed and stored at the investigator's site
- 32 • Ensure that the eCRFs are completed properly and with adequate quality.

#### 33 ***Monitoring activities for:***

- 34 • Checking of ICFs
- 35 • Checking that subjects exist in medical records

36 The extent and nature of monitoring will be decided during the study planning  
37 based on design, complexity, number of subjects, number of sites, etc.

38 Different signals (eg, high rejection rate in a site) should be used as potential  
39 identification of low protocol compliance by investigators.

40 If these or any other signal occurs or if the investigator is suspicious of a potential  
41 non-optimal level of protocol compliance by the site investigator, specific measures  
42 should be adopted to evaluate the situation, identify the issue and implement specific  
43 action plans to correct the situation.  
44  
45  
46  
47  
48  
49  
50  
51  
52  
53  
54  
55  
56  
57  
58  
59  
60

### ***Training of Study Site Personnel***

The Principal Investigator will ensure that appropriate training relevant to the Observational Study is given to investigational staff.

### **Patient and Public Involvement**

No patient involved.

### **Discussion**

HK is common in patients with kidney failure due to diminished renal potassium excretion despite the widespread and dynamic prescription of low-K<sup>+</sup> dialysis baths and K<sup>+</sup> binders. According to a prospective multicenter study in France, the percentage of patients with long-term HD experiencing HK at any time was 73.8% (K<sup>+</sup> >5.1 mmol/L), 57.9% (K<sup>+</sup> >5.5 mmol/L), and 34.5% (K<sup>+</sup> >6 mmol/L).<sup>[14]</sup> Another large retrospective study analyzed data derived from the United States Renal Data System (USRDS), reported that HK prevalence was consistently estimated at 16.3 to 16.8 events per 100 patient-months.<sup>[15]</sup>

Recently, an epidemiological study reported that the prevalence of HK in Chinese outpatients is 3.86%, and the prevalence of hyperkalemia in patients with CKD increased to 22.89%.<sup>[16]</sup> However, there is no high-quality evidence on the epidemiology of HK and no Chinese guidelines on the management of HK in Chinese patients on HD. The PRECEDE-K trial will evaluate the prevalence of HK in Chinese patients on HD.

Previously, acute HK was considered as a fatal complication, however, with the deepened understanding of HK, emphasis have changed from acute HK to chronic HK in the recent years. Acute HK management involves cardiac monitoring, acute medical

1  
2  
3  
4 interventions, or possibly dialysis. However, chronic HK requires ongoing management  
5  
6 to correct the underlying disturbances in potassium balance including  
7  
8 nonpharmacological and pharmacological interventions.<sup>[17]</sup> A higher rate of HK  
9  
10 recurrence was observed 1, 2, and 3 months after an HK occurrence (eg, 35.6% of HK  
11  
12 cases with  $K^+ >6$  mmol/L within 3 months after an initial HK of the same magnitude)  
13  
14 in hepatic hemosiderosis in maintenance hemodialysis (MHD) patients despite  
15  
16 widespread prescription of low- $K^+$  dialysis baths and  $K^+$  binders)<sup>[14]</sup>. Therefore, the  
17  
18 proportion of patients experiencing HK recurrence is an important secondary outcome  
19  
20 in this current study.  
21  
22  
23  
24  
25

26  
27 Compared with pre-dialysis  $K^+$ , post-dialysis  $K^+$  is rarely investigated, and so its  
28  
29 acceptable range remains unknown. Based on the difference between dialysate and  
30  
31 serum potassium levels, serum potassium levels drop significantly after HD, and 45%  
32  
33 of patients present with post-dialysis hypokalemia of  $<3.5$  mmol/L in previous study.<sup>[18-</sup>  
34  
35  
36  
37  
38 <sup>20]</sup>Based on a cohort study of 3967 participants on MHD from the Dialysis Outcomes  
39  
40 and Practice Patterns Study (DOPPS) in Japan (2009-2012 and 2012-2015) compared  
41  
42 with post-dialysis potassium levels 3.0 to  $<3.5$  mEq/L, the hazard ratios of post-dialysis  
43  
44 hypokalemia ( $<3.0$  mEq/L) were 1.84 (1.44-2.34) in the unadjusted model, 1.44 (1.14-  
45  
46 1.82) in the model without adjusting for pre-dialysis serum potassium levels, and 1.10  
47  
48 (0.84-1.44) in the model adjusted for pre-dialysis serum potassium levels. This research  
49  
50 suggested that post-dialysis hypokalemia was associated with mortality, but this  
51  
52 association was not independent of pre-dialysis potassium.<sup>[21]</sup> Therefore, we regarded  
53  
54 intradialytic potassium shift (defined as the difference between pre- and post-dialysis  
55  
56  
57  
58  
59  
60

1  
2  
3  
4 K<sup>+</sup>) as a secondary outcome in our research.  
5

6  
7 A retrospective study reported that the prevalence of HK on the day after the LIDI  
8  
9 was 2.0 to 2.4 times as high as on the day after the SIDI in patients with MHD.<sup>[15]</sup> The  
10  
11 LIDI was reported as a time of heightened risk among patients receiving HD. <sup>[22]</sup> Serum  
12  
13 K<sup>+</sup> levels at LIDI and SIDI in patients receiving HD thrice a week during the first week  
14  
15 after patient enrollment was another secondary outcome.  
16  
17

18  
19 The development of HK is usually the result of a combination of factors  
20  
21 superimposed on comorbidities (eg, diabetes mellitus, advanced stages of heart failure),  
22  
23 use of potassium-based salt substitutes, and use of medications interfering with  
24  
25 potassium homeostasis-like angiotensin-converting enzyme inhibitors (ACEIs),  
26  
27 angiotensin receptor blockers (ARBs), aldosterone receptor antagonists,  $\beta$ -blockers,  
28  
29 and others <sup>[23]</sup>. Considering the potential risk factor of HK, we will record all the  
30  
31 comorbidities and drugs in this study for further exploration.  
32  
33

34  
35 Compared with the reference group of serum potassium level of 4.0 to 5.0 mEq/L,  
36  
37 higher serum potassium level (5.6-6.0 mEq/L) was associated with mortality in adjusted  
38  
39 analysis (HR: 1.13, CI:1.06-1.20), and higher serum potassium levels (>6.0mEq/L) was  
40  
41 associated with arrhythmia composite (includes sudden death or arrhythmia-related  
42  
43 hospitalizations) in adjusted analysis (HR: 1.21, 1.05-1.38).<sup>[3]</sup> Continuous rhythm  
44  
45 monitoring was performed using the remote-monitoring capability of the implantable  
46  
47 loop recorder device in patients undergoing HD at 8 centers.<sup>[24]</sup> In multivariate survival  
48  
49 frailty analyses, a higher risk for conduction disorder was associated with plasma  
50  
51  
52  
53  
54  
55  
56  
57  
58  
59  
60

1  
2  
3  
4 potassium levels >5.0 mmol/L. Further understanding and management of HK will  
5  
6 benefit the survival in MHD patients.  
7

### 8 9 **Conclusion and clinical implications**

10  
11 PRECEDE-K will be the first prospective study on the prevalence, recurrence, and  
12  
13 treatment pattern of HK in patients with HD in China, which will provide  
14  
15 comprehensive data of the disease prevalence, recurrence, and treatment patterns for  
16  
17 HK in patients with HD in China. The results obtained will provide meaningful insights  
18  
19 for guiding physicians in to clinical practice. We hope the results obtained in this study  
20  
21 will provide better perspectives and a high-quality evidence on the occurrence,  
22  
23 recurrence, and treatment of HK in patients on HD.  
24  
25  
26  
27  
28

### 29 30 **Conflict of Interests**

31  
32 The PRECEDE-K Trial was supported by AstraZeneca Investment China Co Ltd,  
33  
34 Shanghai, China.  
35  
36

### 37 38 **Funding**

39  
40 The PRECEDE-K Trial was supported by AstraZeneca Investment China Co Ltd,  
41  
42 Shanghai, China.  
43  
44

### 45 46 **Contributorship statement**

47  
48 Principal investigator(PI), Zhaohui Ni; sub-PI and writing, Haijiao Jin; sub-PI, Renhua  
49  
50 Lu, Li Zuo, Weimin Yu, Junsheng Wang, Rong Wang, Yuqing Ren, Qiongqiong Yang,  
51  
52 Jie Xiao, Qinghong Zhang, Lihong Zhang, Xinzhou Zhang, Qinkai Chen, Chaosheng  
53  
54 Chen, Guojian Shao, Qun Luo, Li Yao, Shuguang Qin and Hui Peng; executive, Qing  
55  
56 Zhao; methodology, Shirley Shang.  
57  
58  
59  
60

## References

1. Liyanage T, Ninomiya T, Jha V, et al., *Worldwide access to treatment for end-stage kidney disease: a systematic review*[J]. *Lancet*, 2015. **385**(9981):1975-82.
2. Rastegar A, Soleimani M, *Hypokalaemia and hyperkalaemia*[J]. *Postgrad Med J*, 2001. **77**(914):759-64.
3. Karaboyas A, Zee J, Brunelli S M, et al., *Dialysate Potassium, Serum Potassium, Mortality, and Arrhythmia Events in Hemodialysis: Results From the Dialysis Outcomes and Practice Patterns Study (DOPPS)*[J]. *Am J Kidney Dis*, 2017. **69**(2):266-277.
4. Nilsson E, Gasparini A, Ärnlov J, et al., *Incidence and determinants of hyperkalemia and hypokalemia in a large healthcare system*[J]. *Int J Cardiol*, 2017. **245**:277-284.
5. Palaka E, Grandy S, Darlington O, et al., *Associations between serum potassium and adverse clinical outcomes: A systematic literature review*[J]. *Int J Clin Pract*, 2020. **74**(1):e13421.
6. Kovesdy C P, Regidor D L, Mehrotra R, et al., *Serum and dialysate potassium concentrations and survival in hemodialysis patients*[J]. *Clin J Am Soc Nephrol*, 2007. **2**(5):999-1007.
7. Herzog C A, Mangrum J M, Passman R, *Sudden cardiac death and dialysis patients*[J]. *Semin Dial*, 2008. **21**(4):300-7.
8. Huang Y M, Xu D, Long J, et al., *Spectrum of chronic kidney disease in China: A national study based on hospitalized patients from 2010 to 2015*[J]. *Nephrology*



1  
2  
3  
4 (Carlton), 2019. **24**(7):725-736.  
5

6  
7 9. Yan Y, Ramirez S, Anand S, et al., *Twice-Weekly Hemodialysis in China: Can It Be*  
8  
9 *A Better Option for Initiation or Maintenance Dialysis Therapy?*[J]. *Semin Dial*, 2017.  
10  
11 **30**(3):277-281.  
12

13  
14 10. Bleyer AJ, Hartman J, Brannon PC. et al. Characteristics of sudden death in  
15  
16 hemodialysis patients. *Kidney Int* 2006; 69: 2268–2273.  
17

18  
19 11. Genovesi S, Valsecchi MG, Rossi E. et al. Sudden death and associated factors in a  
20  
21 historical cohort of chronic haemodialysis patients. *Nephrol Dial Transplant* 2009; 24:  
22  
23 2529–2536.  
24  
25

26  
27 12. Hung AM, Hakim RM.. Dialysate and serum potassium in hemodialysis. *Am J*  
28  
29 *Kidney Dis* 2015; 66: 125–132.  
30

31  
32 13. Labriola L, Jadoul M.. Sailing between Scylla and Charybdis: the high serum K-  
33  
34 low dialysate K quandary. *Semin Dial* 2014; 27: 463–471.  
35

36  
37 14. Rossignol P, Lamiral Z, Frimat L, Girerd N, Duarte K, Ferreira J, Chanliau J, Castin  
38  
39 N. Hyperkalaemia prevalence, recurrence and management in chronic haemodialysis:  
40  
41 a prospective multicentre French regional registry 2-year survey. *Nephrol Dial*  
42  
43 *Transplant*. 2017 1;32(12):2112-2118.  
44  
45

46  
47 15. Yusuf AA, Hu Y, Singh B, Menoyo JA, Wetmore JB. Serum Potassium Levels and  
48  
49 Mortality in Hemodialysis Patients: A Retrospective Cohort Study. *Am J Nephrol*.  
50  
51 2016;44(3):179-86.  
52  
53

54  
55 16. Bian JM, Zuo L, Zhao HY, et al. Epidemiology and treatment pattern of  
56  
57 hyperkalaemia among outpatients in China: a descriptive study using an administrative  
58  
59  
60

- 1  
2  
3  
4 database in China[J]. *Nephrol Dial Transplant*, 2020, 35 Suppl 3: iii1127. DOI:  
5  
6 10.1093/ndt/gfaa142. [https://www.era](https://www.era-edta.org/Virtual-Congress-2020/Accepted_Abstracts_ERAEDTA_2020.pdf) - [edta.org/Virtual](https://www.era-edta.org/Virtual-Congress-2020/Accepted_Abstracts_ERAEDTA_2020.pdf) Congress  
7  
8  
9 2020/Accepted\_Abstracts\_ERAEDTA\_2020.pdf  
10  
11  
12 17. NKF. 2016. Best Practices in Managing Hyperkalemia in CKD national kidney  
13  
14 foundation.  
15  
16  
17 18. Nakai S, Suzuki K, Masakane I, et al: Overview of regular dialysis treatment in  
18  
19 Japan (as of 31 December 2008). *Ther Apher Dial* 14: 505–540, 2010  
20  
21  
22 19. Blumberg A, Roser HW, Zehnder C, et al. Plasma potassium in patients with  
23  
24 terminal renal failure during and after haemodialysis; relationship with dialytic  
25  
26 potassium removal and total body potassium. *Nephrol Dial Transplant* 12: 1629–1634,  
27  
28 1997  
29  
30  
31 20. Agar BU, Culleton BF, Fluck R, et al. Potassium kinetics during  
32  
33 hemodialysis. *Hemodial Int* 19: 23–32, 2015  
34  
35  
36  
37 21. Ohnishi T, Kimachi M, Fukuma S, Akizawa T, Fukuhara S. Postdialysis  
38  
39 Hypokalemia and All-Cause Mortality in Patients Undergoing Maintenance  
40  
41 Hemodialysis. *Clin J Am Soc Nephrol*. 2019 Jun 7;14(6):873-881.  
42  
43  
44  
45 22. Foley RN, Gilbertson DT, Murray T, Collins AJ. Long interdialytic interval and  
46  
47 mortality among patients receiving hemodialysis. *N Engl J Med*. 2011;365(12):1099-  
48  
49 1107.  
50  
51  
52  
53 23. Sarafidis PA, Blacklock R, Wood E, Rumjon A, Simmonds S, Fletcher-Rogers J,  
54  
55 Ariyanayagam R, Al-Yassin A, Sharpe C, Vinen K. Prevalence and factors associated  
56  
57 with hyperkalemia in predialysis patients followed in a low-clearance clinic. *Clin J Am*  
58  
59  
60

1  
2  
3  
4 Soc Nephrol. 2012 Aug;7(8):1234-41.  
5

6 24. Sacher F, Jesel L, Borni-Duval C, et al. Cardiac Rhythm Disturbances in  
7 Hemodialysis Patients: Early Detection Using an Implantable Loop Recorder and  
8 Correlation With Biological and Dialysis Parameters. JACC Clin Electrophysiol. 2018  
9  
10  
11  
12  
13  
14 Mar;4(3):397-408.  
15

16  
17 **Word count** 4968.  
18  
19  
20  
21  
22  
23  
24  
25  
26  
27  
28  
29  
30  
31  
32  
33  
34  
35  
36  
37  
38  
39  
40  
41  
42  
43  
44  
45  
46  
47  
48  
49  
50  
51  
52  
53  
54  
55  
56  
57  
58  
59  
60

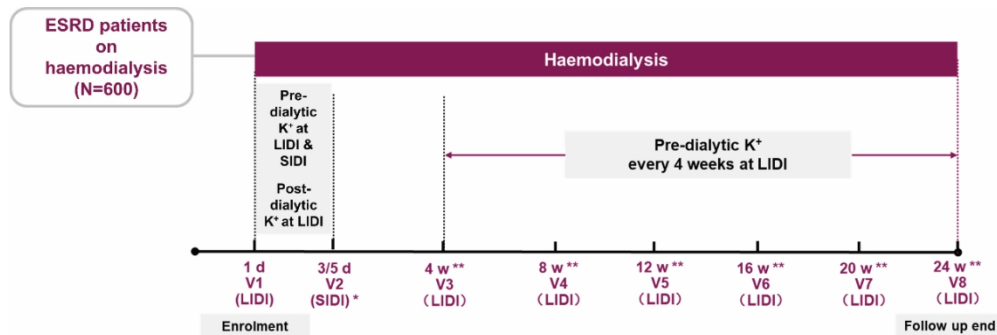

Figure 1. The study design of the PRECEDE-K trial

370x124mm (87 x 87 DPI)

# STUDY INFORMATION AND INFORMED CONSENT FORM

There are [4] parts to this document:

- Part I: the “**Study Information**” essential to your decision to take part in the clinical study.
- Part II: the “**Future Research Information**” which explains the possibility to contribute to future research.
- Part III: your “**Consent Form**” which summarise what you may agree to.
- Part IV: supplementary information in the “**Additional information for patients**” Section.

## PART I: STUDY INFORMATION

[Study number D9480R00033 ]

Title of study: Hyperkalaemia Prevalence, Recurrence and Treatment in Haemodialysis:  
A prospective multi-centre cohort study

Dear Madam/Sir,

You are invited to take part in this study because you are diagnosed with end stage renal disease (ESRD) and is on haemodialysis (HD). Participation requires your written consent. Before you decide whether you want to participate in this study, you will be given an explanation about what the study involves.

The overall description of this study has been reviewed by an independent Ethics Committee to ensure that the rights, safety and well-being of study patients are protected.

Your condition may not improve if you join the study. But, the information we get from this study might help other patients with the same condition in the future.

## 1 What is this study about?

We are doing this study to learn more about occurrence and recurrence of hyperkalaemia (HK) in Chinese HD patients and to understand the treatment pattern of HK in China and also to better understand the risk factors associated with HK.

About 600 people from approximate 15 hospitals will take part in this study.

## 2 Do I have to take part?

You have a choice whether or not you would like to participate.

Please take as much time as you need to make a decision about whether or not you would like to participate in this study. It may be helpful to talk with your friends and family as you make this decision.

If you join the study, you can leave at any time (see “section 10” for more details).

Leaving will not affect your care. If you choose to leave the study, please let your study doctor know as soon as possible.

If you don't join the study, you will continue to receive care for your disease. Your study doctor or treating physician will talk to you about other possible treatments, their risks and benefits.

## 3 What will happen if I join the study?

Because this is an observational study, no medications or other treatments are provided to you by the Sponsor as part of this study.

You will continue to come for your routine doctor's appointments and to take your regular medication as prescribed by your doctor.

You will be in the study for about 6 months.

During the visits, information will be collected for the study and this might add some extra time to your routine visit of approximately 10 minutes.

If you cannot come to a visit, you must tell your study doctor.

Please note that the study, and your participation in the study, may be stopped earlier than expected, for example for scientific or safety reasons (see “section 6” for more details).

## 4 What are the required tests and procedures?

To conduct the study, some tests and procedures will have to be performed on you.

In addition to the standard of care examinations for the disease the following tests and procedures will be included:

- **Enrolment(Day 1, 1 visit)**: You will be in Long interdialytic interval (LIDI) at enrolment.
  - ✓ Demographic characteristics
    - Your general information such as age, gender and race will be collected.
  - ✓ Medical history, Etiology of ESRD
    - Your study doctor will collect information about your medical history (history of previous disease and surgery history) and the cause of ESRD.
  - ✓ Clinical evaluations and laboratory tests
    - Clinical evaluations, which include vascular access, physical examination, height, pre-dialysis and post-dialysis weight, electrocardiography (ECG), echocardiography(not mandatory), blood pressure, pulse, heart rate will be performed.
    - You blood will also be tested for pre-dialysis and post-dialysis serum K+, pre-dialysis BUN and post-dialysis BUN, Blood routine, Biochemistry measurements, Blood gas analysis.
    - Dialysis prescription and frequency will be collected. Dialysis adequacy will be evaluated.
  - ✓ Concomitant medication
    - Any medication used by you while participating in this study will be collected for dosage, duration and mode of administration.
- **Follow-up(24 weeks, 7 or 8 visits)**: You will be in short interdialytic interval (SIDI) at visit 2 (if applicable) and in LIDI at visit 3-8.

### **Visit 2(Only applicable for HD received thrice a week )**

- ✓ Clinical evaluations and laboratory tests
  - Clinical evaluations, which include physical examination, pre-dialysis and post-dialysis weight, blood pressure, pulse, heart rate will be performed.
  - You blood will also be tested for pre-dialysis serum K+.

- ✓ Concomitant medication
  - Any medication used by you while participating in this study will be collected for dosage, duration and mode of administration.

### Visit 3-8

- ✓ Clinical evaluations and laboratory tests
  - Clinical evaluations, which include vascular access, physical examination, pre-dialysis and post-dialysis weight, electrocardiography (ECG, not mandatory), echocardiography(not mandatory), blood pressure, pulse, heart rate will be performed when you visit the study site according to the study schedule.
  - You blood will also be tested for pre-dialysis and post-dialysis serum K+(not mandatory), pre-dialysis BUN and post-dialysis BUN, Blood routine, Biochemistry measurements, Blood gas analysis when you visit the study site according to the study schedule.
  - Dialysis prescription and frequency will be collected, and dialysis adequacy(evaluated at V5) will be evaluated at each visit.
  - Urine 24- hour volume and biochemistry measurements will be performed at V3 or V4.
- ✓ Concomitant medication
  - Any medication used by you while participating in this study will be collected for dosage, duration and mode of administration at each visit.

The complete list of tests and procedures, including their detailed schedule is available in “part 4: Additional Information for Patients”.

## 5 What are the risks and possible benefits of joining the study?

There is no immediate clinical benefit for you, however the information we get from this study may help us to describe how HD patients with HK are managed in real-life practice, and to increase our knowledge about the disease and its symptoms. This will hopefully help us to better treat HD patients with HK in the future.

Since the study is observational, it will not change how your disease is managed by your doctor. There are no physical risks of taking part in this study.



## 6 What happens if something changes while I am in the study, e.g., if new information is found?

Changes may happen in the study that could make you change your mind about continuing to take part. If something changes, we will tell you as soon as possible.

You can choose to leave the study at any time. For more details see section 10 below.

The study doctor can also choose to take you out of the study if they believe that it is best for you.

Your participation in the study also stops when the Sponsor, health authorities, the ethics or regulatory agencies decide that the study must be stopped.

## 7 What happens if I am harmed or injured during the study?

If you become ill or are injured while you are in this study, you must tell your study doctor straight away.

Injuries that have been caused by the study tests or procedures are called 'research injuries'. Injuries caused by your usual medical care or your disease, are not research injuries.

The Sponsor has an insurance to cover the costs of research injuries as long as you have followed your study doctor's instructions. Sponsor will pay the costs of medical treatment for research injuries, provided that the costs are reasonable, and you did not cause the injury yourself.

## 8 What will happen to my data gathered in the study?

### a. Which data are collected?

In order to conduct the study, the Study site will have to collect and register information about your identity (such as your name, address, telephone number) as well as data that is necessary to assess your health conditions, your medical condition and medical history (this may include information from your physicians/ available in your medical records), your demographics (age, gender, *ethnic*).

### b. What are my data needed for?

Your data are needed to better understand the studied disease and associated health problems and publish research results in scientific journals or use them for educational purposes.

### c. Who can access my data?

Only at the study site, your name and contact details will be accessible to the study doctor and the study team to conduct the study. Non-medical personnel acting on behalf of the sponsor and being bound by a duty of confidentiality as well as Health authorities and Ethics Committees may also be given access to this data only to verify that the study is carried out in compliance with legal and quality requirements.

The study site will share your data with the sponsor but only after they have been coded (which means that your name, contact details have been replaced by a code). The sponsor may share your coded data with its Research partners and Service providers for the purposes of a drug development programme.

In order to ensure proper conduct and accurate results of the study the sponsor will share your coded data with authorities and possibly with Ethics Committees. They may also be shared with scientific journals, so the study results can be reviewed by independent scientists and to ensure the accuracy of results.

In **none** of these cases your identity will be revealed.

Some of the above-mentioned persons may be located outside your country. If this other country does not have equivalent personal data protection standards than your country, appropriate Safeguards (such as contracts and technical Security measures) will be adopted to protect and maintain the confidentiality of your data.

### d. How long will my coded data be kept?

The study site and the sponsor are obliged to keep all study data for a number of years to comply with study site's and Sponsor's legal obligations. You can find out more about how the sponsor keeps personal information at [www.astrazenecapersonaldataretention.com](http://www.astrazenecapersonaldataretention.com). Your coded data will then be deleted or anonymised.

### e. What are my rights under data protection law?

Subject to local laws, you have the right to review which of your data are collected and being used;

To ensure the scientific integrity of the study, you will not be able to review some of the data or receive a copy of it until the study ends.

### f. What does anonymised data mean?

Health authorities as well as pharmaceutical companies believe that access to clinical studies data advances clinical science and medical knowledge and is in the best interest of patients and public health, provided that patient privacy is protected. Therefore, the

1  
2  
3 sponsor may generate and share internally or with other researchers an anonymised set  
4 of your data collected in the study (e.g., on [www.clinicalstudydatarequest.com](http://www.clinicalstudydatarequest.com)). This  
5 means your coded data will be stripped of your Patient code as well as of any other  
6 information that could reasonably be used to identify you such as your date of birth.  
7  
8  
9

## 10 9 What are the costs of taking part?

11 Participating in this study will not cost you anything more than the costs related to your  
12 routine appointments with your doctor. You will not be paid for being in this study.  
13

14 You may be reimbursed for reasonable expenses incurred due to your participation in the  
15 study (for example: travel). If so, you will be paid RMB 150 per visit per protocol.  
16  
17  
18  
19

## 20 10 What will happen if I want to quit the study?

21 Your participation in the study is voluntary which means you can stop your participation  
22 at any time. If you want to stop your participation, you should tell the study doctor.  
23

24 If you stop participating in the study, the study doctor will stop the collection of your data  
25 but your previously collected data will be kept and used to guarantee the validity of the  
26 study and comply with regulatory requirements, as allowed by law. The study doctor will  
27 then invite you to have an end of study examination to check your wellbeing. If you don't  
28 show up at a planned visit, the study doctor will try to reach you. If the study doctor  
29 cannot reach you, public sources will be consulted to verify your wellbeing. This is  
30 important for study results. It is not mandatory but would be helpful for the study if you  
31 explain to your study doctor why you wish to stop your participation, in particular if you  
32 have experienced discomforts.  
33  
34  
35  
36  
37  
38

39 If you would like your data not to be used after you quit the study, you must inform the  
40 study doctor. In such case, your coded data previously collected will be kept as required  
41 by clinical regulations.  
42  
43  
44

## 45 11 Who can answer any questions I may have?

46 <Name of ethics committee (EC)> has reviewed the plans for this study to make sure  
47 that people who take part in this study are protected from harm.  
48

49 If you have any questions about your rights during your taking part in this study, you can  
50 contact:  
51

52 < Provide contact name, phone number and address of for EC >  
53

54 If you have any questions about the study, please contact:  
55  
56  
57  
58  
59  
60

|                               |                                                                        |
|-------------------------------|------------------------------------------------------------------------|
| Study doctor <insert details> | Study Coordinator (e.g. nurse appointed to the study) <insert details> |
| Phone No. <insert details>    | Phone No. <insert details>                                             |
| Address <insert details>      | Address <insert details>                                               |

## 12 How to find out more after the study?

Information about this study will be posted on <http://astrazenecaclinicaltrials.com> and <http://www.clinicaltrials.gov>. These websites do not contain any information about you.

You can visit this website for more information. You may also get other information about your participation in the study from Sponsor via your study doctor.

## PART 2: FUTURE RESEARCH INFORMATION

In addition to participating in the study, we would like to know if you would be willing that your coded data are used in future research projects with appropriate ethical approval.

You are free to consent to the use of your coded data for future research. If you decide not to do so, you may still take part in the clinical study.

### 1 What is future research?

Future research is important to advance science and public health. At present, however, it is not possible to foresee all details of future scientific research projects. These future scientific research projects are beyond the scope of the study and use of data as outlined in part 1 and may occur whilst the study is ongoing or after the study has finished.

Your coded data may only be used for scientific health-related research to find new ways to detect, treat, prevent or cure health problems.

They may also be used jointly with information from other sources outside typical clinical research settings, e.g. from public research databases. However, they will not be combined with other information in a way that could identify you. Your coded data and may also be anonymized for some of the future scientific research.

### 2 May my coded data be shared?

The sponsor may share your coded data with research partners. This may include researchers from research hospitals, and companies.

Some of the above-mentioned recipients may be located outside your country. The data protection laws which apply in those countries may not be as stringent as the laws in your country. Nevertheless, appropriate safeguards and security measures will be taken in order to protect and maintain the confidentiality of coded data.

### 3 How will my privacy be protected?

Your coded data will be subject to appropriate safeguards, and will only be used for the purpose of scientific health related research. They will not be used to contact you or to affect your care or any other decision affecting your life such as insurance rates or employment opportunities.

#### 4 What if I want to withdraw from future research?

Your participation in future research is voluntary. You are entitled to withdraw your consent for future research at any time, without giving a reason and without a negative effect on your standard of medical care. If you wish to withdraw, please inform your study doctor.

You may still continue to participate in the research study even if you choose to withdraw from future research.

If you withdraw from future research, your coded data will not be used for future research. Your coded data (either copied from the research study database or newly generated) will also be destroyed unless this information is already included in analyses or used in scientific publications or if the coded data been anonymized and therefore we can't identify your data.

#### 5 Results from Future Research?

We may have to study coded data from many people over many years before we can know if the results of future research are meaningful.

Therefore, you should not expect to receive individual results from future research projects. We will not give any such data to your doctor and we will not put them in your medical record as they are not individual valid results.

You are free to consent to the use of your coded data for FUTURE RESEARCH. If you disagree, you can indicate this in the CONSENT FORM.

**PART III: CONSENT FORM**

|              |                                                                                                                 |               |  |
|--------------|-----------------------------------------------------------------------------------------------------------------|---------------|--|
| Study Code:  | D9480R00033                                                                                                     | Site No:      |  |
| Sponsor:     | AstraZeneca<br>China                                                                                            | Investigator: |  |
| Study Title: | Hyperkalaemia Prevalence, Recurrence and Treatment in<br>Haemodialysis: A prospective multi-centre cohort study |               |  |

I confirm that:

- The study doctor or study personnel delegated by the study doctor has explained the study to me comprehensively.
- I have had the opportunity to discuss the study with the study doctor and all my questions were answered.
- I have had an adequate amount of time to consider the study.
- I have read and understood all the above information related to the study.
- I understand that I will receive a copy of this document once I have signed it.
- I understand that my decision to take part in the study is entirely voluntary. If I decide not to participate in the study or to stop my participation during the study, this will not affect my standard medical care.
- I have truthfully answered all questions about my medical history and will follow all rules listed in the document.

I consent to take part in the research study and study procedures described herein. I understand that my participation also entails:

- My name and contact details being collected during the study as described to me, and accessed and reviewed by listed authorised people;
- My coded data being used by the sponsor or by people or companies acting on its behalf or working with the sponsor;
- My coded data being used by persons or organisations located in countries that do not have data protection rules equivalent to those of my country. I understand that the sponsor monitors these uses and takes all possible measures to protect my privacy;

**SIGNATURE CONSENT FORM**

---

Signature of participant

Date of Signature

---

Printed name of participant

---

Signature of person conducting the informed consent discussion

Date of Signature

---

Printed name of person conducting the informed consent discussion

Please complete the following if legally accepted representative or impartial witness is applicable.

---

Signature of legally accepted representative

Date of Signature

---

Printed name of legally accepted representative

---

Relationship of legally accepted representative to participant

---

Signature of impartial witness

Date of Signature

---

Printed name of impartial witness

**When signed and dated, we will give you a copy of this form.**



## PART IV: ADDITIONAL INFORMATION FOR PATIENTS

### 1 Sponsor details:

|                        |                                                                                                                                                                                 |
|------------------------|---------------------------------------------------------------------------------------------------------------------------------------------------------------------------------|
| <b>Sponsor details</b> | <p>Sponsor: AstraZeneca Investment (China) Co., Ltd, No.199 Liangjing Road Shanghai 201203, China</p> <p>The sponsor has the overall responsibility for the research study.</p> |
|------------------------|---------------------------------------------------------------------------------------------------------------------------------------------------------------------------------|

### 2 Detailed list of visits and Test/Procedures

|                                                        | Visit 1 | Visit 2    | Visit 3 | Visit 4                       | Visit 5 | Visit 6 | Visit 7 | Visit 8 |
|--------------------------------------------------------|---------|------------|---------|-------------------------------|---------|---------|---------|---------|
|                                                        | day 1   | day 3 or 5 | week 4  | week 8                        | week 12 | week 16 | week 20 | week 24 |
| Pre-dialysis serum K <sup>+</sup>                      | X       | X          | X       | X                             | X       | X       | X       | X       |
| Post-dialysis serum K <sup>+</sup>                     | X       |            |         |                               |         |         |         |         |
| Pre-dialysis BUN & Post-dialysis BUN                   | X       |            |         |                               | X       |         |         |         |
| Blood Sample Collection routine                        | X       |            | X       | X                             | X       | X       | X       | X       |
| Blood Biochemistry measurements                        | X       |            | X       | X                             | X       | X       | X       | X       |
| Blood gas analysis                                     | X       |            | X       | X                             | X       | X       | X       | X       |
| Urine 24- hour volume & Urine sample biochemistry test |         |            | X       | X<br>(if not done at visit 3) |         |         |         |         |

# Reporting checklist for protocol of a clinical trial.

Based on the SPIRIT guidelines.

## Instructions to authors

Complete this checklist by entering the page numbers from your manuscript where readers will find each of the items listed below.

Your article may not currently address all the items on the checklist. Please modify your text to include the missing information. If you are certain that an item does not apply, please write "n/a" and provide a short explanation.

Upload your completed checklist as an extra file when you submit to a journal.

In your methods section, say that you used the SPIRIT reporting guidelines, and cite them as:

Chan A-W, Tetzlaff JM, Gøtzsche PC, Altman DG, Mann H, Berlin J, Dickersin K, Hróbjartsson A, Schulz KF, Parulekar WR, Krleža-Jerić K, Laupacis A, Moher D. SPIRIT 2013 Explanation and Elaboration: Guidance for protocols of clinical trials. *BMJ*. 2013;346:e7586

|                                             |                     | Reporting Item                                                                                               | Page Number |
|---------------------------------------------|---------------------|--------------------------------------------------------------------------------------------------------------|-------------|
| <b>Administrative information</b>           |                     |                                                                                                              |             |
| Title                                       | <a href="#">#1</a>  | Descriptive title identifying the study design, population, interventions, and, if applicable, trial acronym | 5-8         |
| Trial registration                          | <a href="#">#2a</a> | Trial identifier and registry name. If not yet registered, name of intended registry                         | 5           |
| Trial registration: data set                | <a href="#">#2b</a> | All items from the World Health Organization Trial Registration Data Set                                     | 6           |
| Protocol version                            | <a href="#">#3</a>  | Date and version identifier                                                                                  | 5           |
| Funding                                     | <a href="#">#4</a>  | Sources and types of financial, material, and other support                                                  | 18          |
| Roles and responsibilities: contributorship | <a href="#">#5a</a> | Names, affiliations, and roles of protocol contributors                                                      | 1-2,23      |

|    |                           |                     |                                                          |     |
|----|---------------------------|---------------------|----------------------------------------------------------|-----|
| 1  | Roles and                 | <a href="#">#5b</a> | Name and contact information for the trial sponsor       | 2   |
| 2  | responsibilities:         |                     |                                                          |     |
| 3  | sponsor contact           |                     |                                                          |     |
| 4  | information               |                     |                                                          |     |
| 5  |                           |                     |                                                          |     |
| 6  |                           |                     |                                                          |     |
| 7  |                           |                     |                                                          |     |
| 8  | Roles and                 | <a href="#">#5c</a> | Role of study sponsor and funders, if any, in study      | 23  |
| 9  | responsibilities:         |                     | design; collection, management, analysis, and            |     |
| 10 | sponsor and funder        |                     | interpretation of data; writing of the report; and the   |     |
| 11 |                           |                     | decision to submit the report for publication,           |     |
| 12 |                           |                     | including whether they will have ultimate authority      |     |
| 13 |                           |                     | over any of these activities                             |     |
| 14 |                           |                     |                                                          |     |
| 15 |                           |                     |                                                          |     |
| 16 |                           |                     |                                                          |     |
| 17 | Roles and                 | <a href="#">#5d</a> | Composition, roles, and responsibilities of the          | 14  |
| 18 | responsibilities:         |                     | coordinating centre, steering committee, endpoint        |     |
| 19 | committees                |                     | adjudication committee, data management team,            |     |
| 20 |                           |                     | and other individuals or groups overseeing the trial,    |     |
| 21 |                           |                     | if applicable (see Item 21a for data monitoring          |     |
| 22 |                           |                     | committee)                                               |     |
| 23 |                           |                     |                                                          |     |
| 24 |                           |                     |                                                          |     |
| 25 |                           |                     |                                                          |     |
| 26 |                           |                     |                                                          |     |
| 27 | <b>Introduction</b>       |                     |                                                          |     |
| 28 |                           |                     |                                                          |     |
| 29 |                           |                     |                                                          |     |
| 30 | Background and            | <a href="#">#6a</a> | Description of research question and justification for   | 4-5 |
| 31 | rationale                 |                     | undertaking the trial, including summary of relevant     |     |
| 32 |                           |                     | studies (published and unpublished) examining            |     |
| 33 |                           |                     | benefits and harms for each intervention                 |     |
| 34 |                           |                     |                                                          |     |
| 35 |                           |                     |                                                          |     |
| 36 | Background and            | <a href="#">#6b</a> | Explanation for choice of comparators                    | 5   |
| 37 | rationale: choice of      |                     |                                                          |     |
| 38 | comparators               |                     |                                                          |     |
| 39 |                           |                     |                                                          |     |
| 40 |                           |                     |                                                          |     |
| 41 |                           |                     |                                                          |     |
| 42 | Objectives                | <a href="#">#7</a>  | Specific objectives or hypotheses                        | 2   |
| 43 |                           |                     |                                                          |     |
| 44 | Trial design              | <a href="#">#8</a>  | Description of trial design including type of trial (eg, | 5   |
| 45 |                           |                     | parallel group, crossover, factorial, single group),     |     |
| 46 |                           |                     | allocation ratio, and framework (eg, superiority,        |     |
| 47 |                           |                     | equivalence, non-inferiority, exploratory)               |     |
| 48 |                           |                     |                                                          |     |
| 49 |                           |                     |                                                          |     |
| 50 |                           |                     |                                                          |     |
| 51 | <b>Methods:</b>           |                     |                                                          |     |
| 52 | <b>Participants,</b>      |                     |                                                          |     |
| 53 | <b>interventions, and</b> |                     |                                                          |     |
| 54 | <b>outcomes</b>           |                     |                                                          |     |
| 55 |                           |                     |                                                          |     |
| 56 |                           |                     |                                                          |     |
| 57 |                           |                     |                                                          |     |
| 58 | Study setting             | <a href="#">#9</a>  | Description of study settings (eg, community clinic,     | 6-7 |
| 59 |                           |                     |                                                          |     |
| 60 |                           |                     |                                                          |     |

|    |                      |                                                                             |      |
|----|----------------------|-----------------------------------------------------------------------------|------|
| 1  |                      | academic hospital) and list of countries where data                         |      |
| 2  |                      | will be collected. Reference to where list of study                         |      |
| 3  |                      | sites can be obtained                                                       |      |
| 4  |                      |                                                                             |      |
| 5  | Eligibility criteria | <a href="#">#10</a> Inclusion and exclusion criteria for participants. If   | 8-9  |
| 6  |                      | applicable, eligibility criteria for study centres and                      |      |
| 7  |                      | individuals who will perform the interventions (eg,                         |      |
| 8  |                      | surgeons, psychotherapists)                                                 |      |
| 9  |                      |                                                                             |      |
| 10 |                      |                                                                             |      |
| 11 |                      |                                                                             |      |
| 12 | Interventions:       | <a href="#">#11a</a> Interventions for each group with sufficient detail to | NA   |
| 13 | description          | allow replication, including how and when they will                         |      |
| 14 |                      | be administered                                                             |      |
| 15 |                      |                                                                             |      |
| 16 |                      |                                                                             |      |
| 17 | Interventions:       | <a href="#">#11b</a> Criteria for discontinuing or modifying allocated      | NA   |
| 18 | modifications        | interventions for a given trial participant (eg, drug                       |      |
| 19 |                      | dose change in response to harms, participant                               |      |
| 20 |                      | request, or improving / worsening disease)                                  |      |
| 21 |                      |                                                                             |      |
| 22 |                      |                                                                             |      |
| 23 |                      |                                                                             |      |
| 24 | Interventions:       | <a href="#">#11c</a> Strategies to improve adherence to intervention        | 7-8  |
| 25 | adherence            | protocols, and any procedures for monitoring                                |      |
| 26 |                      | adherence (eg, drug tablet return; laboratory tests)                        |      |
| 27 |                      |                                                                             |      |
| 28 |                      |                                                                             |      |
| 29 |                      |                                                                             |      |
| 30 | Interventions:       | <a href="#">#11d</a> Relevant concomitant care and interventions that       | NA   |
| 31 | concomitant care     | are permitted or prohibited during the trial                                |      |
| 32 |                      |                                                                             |      |
| 33 |                      |                                                                             |      |
| 34 | Outcomes             | <a href="#">#12</a> Primary, secondary, and other outcomes, including       | 9-10 |
| 35 |                      | the specific measurement variable (eg, systolic                             |      |
| 36 |                      | blood pressure), analysis metric (eg, change from                           |      |
| 37 |                      | baseline, final value, time to event), method of                            |      |
| 38 |                      | aggregation (eg, median, proportion), and time point                        |      |
| 39 |                      | for each outcome. Explanation of the clinical                               |      |
| 40 |                      | relevance of chosen efficacy and harm outcomes is                           |      |
| 41 |                      | strongly recommended                                                        |      |
| 42 |                      |                                                                             |      |
| 43 |                      |                                                                             |      |
| 44 |                      |                                                                             |      |
| 45 |                      |                                                                             |      |
| 46 | Participant timeline | <a href="#">#13</a> Time schedule of enrolment, interventions (including    | 6-7  |
| 47 |                      | any run-ins and washouts), assessments, and visits                          |      |
| 48 |                      | for participants. A schematic diagram is highly                             |      |
| 49 |                      | recommended (see Figure)                                                    |      |
| 50 |                      |                                                                             |      |
| 51 |                      |                                                                             |      |
| 52 |                      |                                                                             |      |
| 53 | Sample size          | <a href="#">#14</a> Estimated number of participants needed to achieve      | 14   |
| 54 |                      | study objectives and how it was determined,                                 |      |
| 55 |                      | including clinical and statistical assumptions                              |      |
| 56 |                      | supporting any sample size calculations                                     |      |
| 57 |                      |                                                                             |      |
| 58 |                      |                                                                             |      |
| 59 |                      |                                                                             |      |
| 60 |                      |                                                                             |      |

|    |                           |                      |                                                                                                                                                                                                                                                                                                                                                          |     |
|----|---------------------------|----------------------|----------------------------------------------------------------------------------------------------------------------------------------------------------------------------------------------------------------------------------------------------------------------------------------------------------------------------------------------------------|-----|
| 1  | Recruitment               | <a href="#">#15</a>  | Strategies for achieving adequate participant enrolment to reach target sample size                                                                                                                                                                                                                                                                      | 8-9 |
| 2  |                           |                      |                                                                                                                                                                                                                                                                                                                                                          |     |
| 3  |                           |                      |                                                                                                                                                                                                                                                                                                                                                          |     |
| 4  |                           |                      |                                                                                                                                                                                                                                                                                                                                                          |     |
| 5  | <b>Methods:</b>           |                      |                                                                                                                                                                                                                                                                                                                                                          | NA  |
| 6  | <b>Assignment of</b>      |                      |                                                                                                                                                                                                                                                                                                                                                          |     |
| 7  | <b>interventions (for</b> |                      |                                                                                                                                                                                                                                                                                                                                                          |     |
| 8  | <b>controlled trials)</b> |                      |                                                                                                                                                                                                                                                                                                                                                          |     |
| 9  |                           |                      |                                                                                                                                                                                                                                                                                                                                                          |     |
| 10 |                           |                      |                                                                                                                                                                                                                                                                                                                                                          |     |
| 11 | Allocation: sequence      | <a href="#">#16a</a> | Method of generating the allocation sequence (eg, computer-generated random numbers), and list of any factors for stratification. To reduce predictability of a random sequence, details of any planned restriction (eg, blocking) should be provided in a separate document that is unavailable to those who enrol participants or assign interventions | NA  |
| 12 | generation                |                      |                                                                                                                                                                                                                                                                                                                                                          |     |
| 13 |                           |                      |                                                                                                                                                                                                                                                                                                                                                          |     |
| 14 |                           |                      |                                                                                                                                                                                                                                                                                                                                                          |     |
| 15 |                           |                      |                                                                                                                                                                                                                                                                                                                                                          |     |
| 16 |                           |                      |                                                                                                                                                                                                                                                                                                                                                          |     |
| 17 |                           |                      |                                                                                                                                                                                                                                                                                                                                                          |     |
| 18 |                           |                      |                                                                                                                                                                                                                                                                                                                                                          |     |
| 19 |                           |                      |                                                                                                                                                                                                                                                                                                                                                          |     |
| 20 |                           |                      |                                                                                                                                                                                                                                                                                                                                                          |     |
| 21 |                           |                      |                                                                                                                                                                                                                                                                                                                                                          |     |
| 22 |                           |                      |                                                                                                                                                                                                                                                                                                                                                          |     |
| 23 | Allocation                | <a href="#">#16b</a> | Mechanism of implementing the allocation sequence                                                                                                                                                                                                                                                                                                        | NA  |
| 24 | concealment               |                      | (eg, central telephone; sequentially numbered, opaque, sealed envelopes), describing any steps to conceal the sequence until interventions are assigned                                                                                                                                                                                                  |     |
| 25 | mechanism                 |                      |                                                                                                                                                                                                                                                                                                                                                          |     |
| 26 |                           |                      |                                                                                                                                                                                                                                                                                                                                                          |     |
| 27 |                           |                      |                                                                                                                                                                                                                                                                                                                                                          |     |
| 28 |                           |                      |                                                                                                                                                                                                                                                                                                                                                          |     |
| 29 |                           |                      |                                                                                                                                                                                                                                                                                                                                                          |     |
| 30 |                           |                      |                                                                                                                                                                                                                                                                                                                                                          |     |
| 31 | Allocation:               | <a href="#">#16c</a> | Who will generate the allocation sequence, who will enrol participants, and who will assign participants to interventions                                                                                                                                                                                                                                | NA  |
| 32 | implementation            |                      |                                                                                                                                                                                                                                                                                                                                                          |     |
| 33 |                           |                      |                                                                                                                                                                                                                                                                                                                                                          |     |
| 34 |                           |                      |                                                                                                                                                                                                                                                                                                                                                          |     |
| 35 |                           |                      |                                                                                                                                                                                                                                                                                                                                                          |     |
| 36 | Blinding (masking)        | <a href="#">#17a</a> | Who will be blinded after assignment to interventions (eg, trial participants, care providers, outcome assessors, data analysts), and how                                                                                                                                                                                                                | NA  |
| 37 |                           |                      |                                                                                                                                                                                                                                                                                                                                                          |     |
| 38 |                           |                      |                                                                                                                                                                                                                                                                                                                                                          |     |
| 39 |                           |                      |                                                                                                                                                                                                                                                                                                                                                          |     |
| 40 |                           |                      |                                                                                                                                                                                                                                                                                                                                                          |     |
| 41 |                           |                      |                                                                                                                                                                                                                                                                                                                                                          |     |
| 42 | Blinding (masking):       | <a href="#">#17b</a> | If blinded, circumstances under which unblinding is permissible, and procedure for revealing a participant's allocated intervention during the trial                                                                                                                                                                                                     | NA  |
| 43 | emergency                 |                      |                                                                                                                                                                                                                                                                                                                                                          |     |
| 44 | unblinding                |                      |                                                                                                                                                                                                                                                                                                                                                          |     |
| 45 |                           |                      |                                                                                                                                                                                                                                                                                                                                                          |     |
| 46 |                           |                      |                                                                                                                                                                                                                                                                                                                                                          |     |
| 47 | <b>Methods: Data</b>      |                      |                                                                                                                                                                                                                                                                                                                                                          |     |
| 48 | <b>collection,</b>        |                      |                                                                                                                                                                                                                                                                                                                                                          |     |
| 49 | <b>management, and</b>    |                      |                                                                                                                                                                                                                                                                                                                                                          |     |
| 50 | <b>analysis</b>           |                      |                                                                                                                                                                                                                                                                                                                                                          |     |
| 51 |                           |                      |                                                                                                                                                                                                                                                                                                                                                          |     |
| 52 |                           |                      |                                                                                                                                                                                                                                                                                                                                                          |     |
| 53 |                           |                      |                                                                                                                                                                                                                                                                                                                                                          |     |
| 54 | Data collection plan      | <a href="#">#18a</a> | Plans for assessment and collection of outcome, baseline, and other trial data, including any related processes to promote data quality (eg, duplicate measurements, training of assessors) and a                                                                                                                                                        | 8   |
| 55 |                           |                      |                                                                                                                                                                                                                                                                                                                                                          |     |
| 56 |                           |                      |                                                                                                                                                                                                                                                                                                                                                          |     |
| 57 |                           |                      |                                                                                                                                                                                                                                                                                                                                                          |     |
| 58 |                           |                      |                                                                                                                                                                                                                                                                                                                                                          |     |
| 59 |                           |                      |                                                                                                                                                                                                                                                                                                                                                          |     |
| 60 |                           |                      |                                                                                                                                                                                                                                                                                                                                                          |     |

description of study instruments (eg, questionnaires, laboratory tests) along with their reliability and validity, if known. Reference to where data collection forms can be found, if not in the protocol

|    |                        |                      |                                                           |
|----|------------------------|----------------------|-----------------------------------------------------------|
| 1  |                        |                      |                                                           |
| 2  |                        |                      |                                                           |
| 3  |                        |                      |                                                           |
| 4  |                        |                      |                                                           |
| 5  |                        |                      |                                                           |
| 6  |                        |                      |                                                           |
| 7  | Data collection plan:  | <a href="#">#18b</a> | Plans to promote participant retention and complete       |
| 8  | retention              |                      | follow-up, including list of any outcome data to be       |
| 9  |                        |                      | collected for participants who discontinue or deviate     |
| 10 |                        |                      | from intervention protocols                               |
| 11 |                        |                      |                                                           |
| 12 |                        |                      |                                                           |
| 13 |                        |                      |                                                           |
| 14 | Data management        | <a href="#">#19</a>  | Plans for data entry, coding, security, and storage,      |
| 15 |                        |                      | including any related processes to promote data           |
| 16 |                        |                      | quality (eg, double data entry; range checks for data     |
| 17 |                        |                      | values). Reference to where details of data               |
| 18 |                        |                      | management procedures can be found, if not in the         |
| 19 |                        |                      | protocol                                                  |
| 20 |                        |                      |                                                           |
| 21 |                        |                      |                                                           |
| 22 |                        |                      |                                                           |
| 23 | Statistics: outcomes   | <a href="#">#20a</a> | Statistical methods for analysing primary and             |
| 24 |                        |                      | secondary outcomes. Reference to where other              |
| 25 |                        |                      | details of the statistical analysis plan can be found, if |
| 26 |                        |                      | not in the protocol                                       |
| 27 |                        |                      |                                                           |
| 28 |                        |                      |                                                           |
| 29 |                        |                      |                                                           |
| 30 | Statistics: additional | <a href="#">#20b</a> | Methods for any additional analyses (eg, subgroup         |
| 31 | analyses               |                      | and adjusted analyses)                                    |
| 32 |                        |                      |                                                           |
| 33 |                        |                      |                                                           |
| 34 | Statistics: analysis   | <a href="#">#20c</a> | Definition of analysis population relating to protocol    |
| 35 | population and         |                      | non-adherence (eg, as randomised analysis), and           |
| 36 | missing data           |                      | any statistical methods to handle missing data (eg,       |
| 37 |                        |                      | multiple imputation)                                      |
| 38 |                        |                      |                                                           |
| 39 |                        |                      |                                                           |
| 40 |                        |                      |                                                           |
| 41 | <b>Methods:</b>        |                      |                                                           |
| 42 | <b>Monitoring</b>      |                      |                                                           |
| 43 |                        |                      |                                                           |
| 44 |                        |                      |                                                           |
| 45 | Data monitoring:       | <a href="#">#21a</a> | Composition of data monitoring committee (DMC);           |
| 46 | formal committee       |                      | summary of its role and reporting structure;              |
| 47 |                        |                      | statement of whether it is independent from the           |
| 48 |                        |                      | sponsor and competing interests; and reference to         |
| 49 |                        |                      | where further details about its charter can be found,     |
| 50 |                        |                      | if not in the protocol. Alternatively, an explanation of  |
| 51 |                        |                      | why a DMC is not needed                                   |
| 52 |                        |                      |                                                           |
| 53 |                        |                      |                                                           |
| 54 |                        |                      |                                                           |
| 55 |                        |                      |                                                           |
| 56 | Data monitoring:       | <a href="#">#21b</a> | Description of any interim analyses and stopping          |
| 57 | interim analysis       |                      | guidelines, including who will have access to these       |
| 58 |                        |                      |                                                           |
| 59 |                        |                      |                                                           |
| 60 |                        |                      |                                                           |

|    |                      |                                                                            |               |
|----|----------------------|----------------------------------------------------------------------------|---------------|
| 1  |                      | interim results and make the final decision to                             |               |
| 2  |                      | terminate the trial                                                        |               |
| 3  |                      |                                                                            |               |
| 4  | Harms                | <a href="#">#22</a> Plans for collecting, assessing, reporting, and        | supplementary |
| 5  |                      | managing solicited and spontaneously reported                              | materials     |
| 6  |                      | adverse events and other unintended effects of trial                       |               |
| 7  |                      | interventions or trial conduct                                             |               |
| 8  |                      |                                                                            |               |
| 9  |                      |                                                                            |               |
| 10 |                      |                                                                            |               |
| 11 | Auditing             | <a href="#">#23</a> Frequency and procedures for auditing trial conduct,   | 15            |
| 12 |                      | if any, and whether the process will be independent                        |               |
| 13 |                      | from investigators and the sponsor                                         |               |
| 14 |                      |                                                                            |               |
| 15 |                      |                                                                            |               |
| 16 | <b>Ethics and</b>    |                                                                            |               |
| 17 | <b>dissemination</b> |                                                                            |               |
| 18 |                      |                                                                            |               |
| 19 |                      |                                                                            |               |
| 20 | Research ethics      | <a href="#">#24</a> Plans for seeking research ethics committee /          | 14            |
| 21 | approval             | institutional review board (REC / IRB) approval                            |               |
| 22 |                      |                                                                            |               |
| 23 |                      |                                                                            |               |
| 24 | Protocol             | <a href="#">#25</a> Plans for communicating important protocol             | 14            |
| 25 | amendments           | modifications (eg, changes to eligibility criteria,                        |               |
| 26 |                      | outcomes, analyses) to relevant parties (eg,                               |               |
| 27 |                      | investigators, REC / IRBs, trial participants, trial                       |               |
| 28 |                      | registries, journals, regulators)                                          |               |
| 29 |                      |                                                                            |               |
| 30 |                      |                                                                            |               |
| 31 |                      |                                                                            |               |
| 32 | Consent or assent    | <a href="#">#26a</a> Who will obtain informed consent or assent from       | 14            |
| 33 |                      | potential trial participants or authorised surrogates,                     |               |
| 34 |                      | and how (see Item 32)                                                      |               |
| 35 |                      |                                                                            |               |
| 36 |                      |                                                                            |               |
| 37 | Consent or assent:   | <a href="#">#26b</a> Additional consent provisions for collection and use  | 14            |
| 38 | ancillary studies    | of participant data and biological specimens in                            |               |
| 39 |                      | ancillary studies, if applicable                                           |               |
| 40 |                      |                                                                            |               |
| 41 |                      |                                                                            |               |
| 42 |                      |                                                                            |               |
| 43 | Confidentiality      | <a href="#">#27</a> How personal information about potential and           | 14            |
| 44 |                      | enrolled participants will be collected, shared, and                       |               |
| 45 |                      | maintained in order to protect confidentiality before,                     |               |
| 46 |                      | during, and after the trial                                                |               |
| 47 |                      |                                                                            |               |
| 48 |                      |                                                                            |               |
| 49 | Declaration of       | <a href="#">#28</a> Financial and other competing interests for principal  | 18            |
| 50 | interests            | investigators for the overall trial and each study site                    |               |
| 51 |                      |                                                                            |               |
| 52 |                      |                                                                            |               |
| 53 | Data access          | <a href="#">#29</a> Statement of who will have access to the final trial   | 18            |
| 54 |                      | dataset, and disclosure of contractual agreements                          |               |
| 55 |                      | that limit such access for investigators                                   |               |
| 56 |                      |                                                                            |               |
| 57 |                      |                                                                            |               |
| 58 |                      |                                                                            |               |
| 59 | Ancillary and post   | <a href="#">#30</a> Provisions, if any, for ancillary and post-trial care, | NA            |
| 60 |                      |                                                                            |               |

|    |                       |                      |                                                          |               |
|----|-----------------------|----------------------|----------------------------------------------------------|---------------|
| 1  | trial care            |                      | and for compensation to those who suffer harm from       |               |
| 2  |                       |                      | trial participation                                      |               |
| 3  |                       |                      |                                                          |               |
| 4  | Dissemination policy: | <a href="#">#31a</a> | Plans for investigators and sponsor to communicate       | 19            |
| 5  | trial results         |                      | trial results to participants, healthcare professionals, |               |
| 6  |                       |                      | the public, and other relevant groups (eg, via           |               |
| 7  |                       |                      | publication, reporting in results databases, or other    |               |
| 8  |                       |                      | data sharing arrangements), including any                |               |
| 9  |                       |                      | publication restrictions                                 |               |
| 10 |                       |                      |                                                          |               |
| 11 |                       |                      |                                                          |               |
| 12 |                       |                      |                                                          |               |
| 13 |                       |                      |                                                          |               |
| 14 | Dissemination policy: | <a href="#">#31b</a> | Authorship eligibility guidelines and any intended       | 23            |
| 15 | authorship            |                      | use of professional writers                              |               |
| 16 |                       |                      |                                                          |               |
| 17 | Dissemination policy: | <a href="#">#31c</a> | Plans, if any, for granting public access to the full    | NA            |
| 18 | reproducible          |                      | protocol, participant-level dataset, and statistical     |               |
| 19 | research              |                      | code                                                     |               |
| 20 |                       |                      |                                                          |               |
| 21 |                       |                      |                                                          |               |
| 22 |                       |                      |                                                          |               |
| 23 | <b>Appendices</b>     |                      |                                                          |               |
| 24 |                       |                      |                                                          |               |
| 25 | Informed consent      | <a href="#">#32</a>  | Model consent form and other related                     | supplementary |
| 26 | materials             |                      | documentation given to participants and authorised       | materials     |
| 27 |                       |                      | surrogates                                               |               |
| 28 |                       |                      |                                                          |               |
| 29 |                       |                      |                                                          |               |
| 30 | Biological specimens  | <a href="#">#33</a>  | Plans for collection, laboratory evaluation, and         | NA            |
| 31 |                       |                      | storage of biological specimens for genetic or           |               |
| 32 |                       |                      | molecular analysis in the current trial and for future   |               |
| 33 |                       |                      | use in ancillary studies, if applicable                  |               |
| 34 |                       |                      |                                                          |               |
| 35 |                       |                      |                                                          |               |
| 36 |                       |                      |                                                          |               |

37 None The SPIRIT Explanation and Elaboration paper is distributed under the terms of the Creative  
 38 Commons Attribution License CC-BY-NC. This checklist can be completed online using  
 39 <https://www.goodreports.org/>, a tool made by the [EQUATOR Network](#) in collaboration with  
 40 [Penelope.ai](#)  
 41  
 42  
 43  
 44  
 45  
 46  
 47  
 48  
 49  
 50  
 51  
 52  
 53  
 54  
 55  
 56  
 57  
 58  
 59  
 60



# BMJ Open

## Hyperkalemia prevalence, recurrence, and treatment in patients on haemodialysis in China: protocol for a prospective multicentre cohort study (PRECEDE-K)

|                                 |                                                                                                                                                                                                                                                                                                                                                                                                                                                                                                                                                                                                                                                                                                                                                                                                                                                                                                                                                                                                                                                                                                                                                                                                                                                                                                                                                                                                                                                                                                                                                                                                         |
|---------------------------------|---------------------------------------------------------------------------------------------------------------------------------------------------------------------------------------------------------------------------------------------------------------------------------------------------------------------------------------------------------------------------------------------------------------------------------------------------------------------------------------------------------------------------------------------------------------------------------------------------------------------------------------------------------------------------------------------------------------------------------------------------------------------------------------------------------------------------------------------------------------------------------------------------------------------------------------------------------------------------------------------------------------------------------------------------------------------------------------------------------------------------------------------------------------------------------------------------------------------------------------------------------------------------------------------------------------------------------------------------------------------------------------------------------------------------------------------------------------------------------------------------------------------------------------------------------------------------------------------------------|
| Journal:                        | <i>BMJ Open</i>                                                                                                                                                                                                                                                                                                                                                                                                                                                                                                                                                                                                                                                                                                                                                                                                                                                                                                                                                                                                                                                                                                                                                                                                                                                                                                                                                                                                                                                                                                                                                                                         |
| Manuscript ID                   | bmjopen-2021-055770.R1                                                                                                                                                                                                                                                                                                                                                                                                                                                                                                                                                                                                                                                                                                                                                                                                                                                                                                                                                                                                                                                                                                                                                                                                                                                                                                                                                                                                                                                                                                                                                                                  |
| Article Type:                   | Protocol                                                                                                                                                                                                                                                                                                                                                                                                                                                                                                                                                                                                                                                                                                                                                                                                                                                                                                                                                                                                                                                                                                                                                                                                                                                                                                                                                                                                                                                                                                                                                                                                |
| Date Submitted by the Author:   | 13-Oct-2021                                                                                                                                                                                                                                                                                                                                                                                                                                                                                                                                                                                                                                                                                                                                                                                                                                                                                                                                                                                                                                                                                                                                                                                                                                                                                                                                                                                                                                                                                                                                                                                             |
| Complete List of Authors:       | Ni, Zhaohui; Shanghai Jiao Tong University School of Medicine Affiliated Renji Hospital, Department of Nephrology, Jin, Haijiao; Shanghai Jiao Tong University School of Medicine Affiliated Renji Hospital, Department of Nephrology, Lu, Renhua; Shanghai Jiao Tong University School of Medicine Affiliated Renji Hospital, Department of Nephrology Zuo, Li; Peking University People's Hospital, Department of Nephrology Yu, Weimin; Shanxi Bethune Hospital, Department of Nephrology Ren, Yuqing; Yangquan Coal Industry (Group) General Hospital, Department of Nephrology Yang, Qiongqiong; Sun Yat-Sen Memorial Hospital, Department of Nephrology Xiao, Jie; First Affiliated Hospital of Guangzhou Medical College, Department of Nephrology Zhang, Qinghong; Taihe Hospital, Department of Nephrology Zhang, Lihong; Hebei Medical University First Affiliated Hospital, Department of Nephrology Zhang, Xinzhou; Shenzhen People's Hospital, Department of Nephrology Chen, Qinkai; First Affiliated Hospital of Nanchang University Chen, Chaosheng; The First Affiliated Hospital of Wenzhou Medical University, Department of Nephrology Shao, Guojian; Wenzhou Central Hospital, Department of Nephrology Luo, Qun; Ningbo No 2 Hospital, Department of Nephrology Yao, Li; China Medical University First Hospital, Department of Nephrology Qin, Shuguang; Guangzhou First People's Hospital, Department of Nephrology Peng, Hui ; Third Affiliated Hospital of Sun Yat-Sen University, Department of Nephrology Zhao, Qing; AstraZeneca Investment China Co Ltd, Medical Affaires |
| <b>Primary Subject Heading</b>: | Renal medicine                                                                                                                                                                                                                                                                                                                                                                                                                                                                                                                                                                                                                                                                                                                                                                                                                                                                                                                                                                                                                                                                                                                                                                                                                                                                                                                                                                                                                                                                                                                                                                                          |
| Secondary Subject Heading:      | Renal medicine, Urology                                                                                                                                                                                                                                                                                                                                                                                                                                                                                                                                                                                                                                                                                                                                                                                                                                                                                                                                                                                                                                                                                                                                                                                                                                                                                                                                                                                                                                                                                                                                                                                 |
| Keywords:                       | Dialysis < NEPHROLOGY, End stage renal failure < NEPHROLOGY, EPIDEMIOLOGY                                                                                                                                                                                                                                                                                                                                                                                                                                                                                                                                                                                                                                                                                                                                                                                                                                                                                                                                                                                                                                                                                                                                                                                                                                                                                                                                                                                                                                                                                                                               |

1  
2  
3  
4  
5  
6  
7  
8  
9  
10  
11  
12  
13  
14  
15  
16  
17  
18  
19  
20  
21  
22  
23  
24  
25  
26  
27  
28  
29  
30  
31  
32  
33  
34  
35  
36  
37  
38  
39  
40  
41  
42  
43  
44  
45  
46  
47  
48  
49  
50  
51  
52  
53  
54  
55  
56  
57  
58  
59  
60



SCHOLARONE™  
Manuscripts

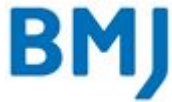

I, the Submitting Author has the right to grant and does grant on behalf of all authors of the Work (as defined in the below author licence), an exclusive licence and/or a non-exclusive licence for contributions from authors who are: i) UK Crown employees; ii) where BMJ has agreed a CC-BY licence shall apply, and/or iii) in accordance with the terms applicable for US Federal Government officers or employees acting as part of their official duties; on a worldwide, perpetual, irrevocable, royalty-free basis to BMJ Publishing Group Ltd ("BMJ") its licensees and where the relevant Journal is co-owned by BMJ to the co-owners of the Journal, to publish the Work in this journal and any other BMJ products and to exploit all rights, as set out in our [licence](#).

The Submitting Author accepts and understands that any supply made under these terms is made by BMJ to the Submitting Author unless you are acting as an employee on behalf of your employer or a postgraduate student of an affiliated institution which is paying any applicable article publishing charge ("APC") for Open Access articles. Where the Submitting Author wishes to make the Work available on an Open Access basis (and intends to pay the relevant APC), the terms of reuse of such Open Access shall be governed by a Creative Commons licence – details of these licences and which [Creative Commons](#) licence will apply to this Work are set out in our licence referred to above.

Other than as permitted in any relevant BMJ Author's Self Archiving Policies, I confirm this Work has not been accepted for publication elsewhere, is not being considered for publication elsewhere and does not duplicate material already published. I confirm all authors consent to publication of this Work and authorise the granting of this licence.

1  
2  
3  
4 **Hyperkalemia prevalence, recurrence, and treatment in patients on**  
5  
6 **haemodialysis in China: protocol for a prospective multicentre cohort study**  
7  
8  
9 **(PRECEDE-K)**  
10

11 Zhaohui Ni<sup>1\*</sup>, Haijiao Jin<sup>1</sup>, Renhua Lu<sup>1</sup>, Li Zuo<sup>2</sup>, Weimin Yu<sup>3</sup>, Yuqing Ren<sup>4</sup>,  
12  
13 Qiongqiong Yang<sup>5</sup>, Jie Xiao<sup>6</sup>, Qinghong Zhang<sup>7</sup>, Lihong Zhang<sup>8</sup>, Xinzhou Zhang<sup>9</sup>,  
14  
15 Qinkai Chen<sup>10</sup>, Chaosheng Chen<sup>11</sup>, Guojian Shao<sup>12</sup>, Qun Luo<sup>13</sup>, Li Yao<sup>14</sup>, Shuguang  
16  
17 Qin<sup>15</sup>, Hui Peng<sup>16</sup>, Qing Zhao<sup>17</sup>, and the PRECEDE-K study group  
18  
19  
20  
21  
22  
23  
24

25 Zhaohui Ni and Haijiao Jin contribute equally to the article.  
26  
27  
28  
29

30 <sup>1</sup>Renji Hospital, School of Medicine, Shanghai Jiaotong University, Shanghai, China.  
31

32 <sup>2</sup>Peking University People's Hospital, Beijing, China.  
33

34 <sup>3</sup>Shanxi Bethune Hospital, Taiyuan, China.  
35  
36

37 <sup>4</sup>Yangquan Coal Industry (Group) General Hospital, Yangquan, China.  
38  
39

40 <sup>5</sup>Sun Yat-sen Memorial Hospital, Sun Yat-sen University, Guangzhou, China.  
41  
42

43 <sup>6</sup>The First Affiliated Hospital of Guangzhou Medical University, Guangzhou, China.  
44  
45

46 <sup>7</sup>Taihe Hospital of Shiyuan City, Shiyuan, China.  
47

48 <sup>8</sup>The First Hospital of Hebei Medical University, Shijiazhuang, China.  
49  
50

51 <sup>9</sup>Shenzhen People's Hospital, Shenzhen, China.  
52

53 <sup>10</sup>The First Affiliated Hospital of Nanchang University, Nanchang, China.  
54  
55

56 <sup>11</sup>The First Affiliated Hospital of Wenzhou Medical University, Wenzhou, China.  
57  
58

59 <sup>12</sup>Wenzhou Central Hospital, Wenzhou, China.  
60

1  
2  
3  
4 <sup>13</sup>Ningbo No.2 Hospital, Ningbo, China.  
5

6 <sup>14</sup>The First Affiliated Hospital of China Medical University, Shenyang, China.  
7  
8

9 <sup>15</sup>Guangzhou First People's Hospital, Guangzhou, China.  
10

11 <sup>16</sup>The Third Affiliated Hospital of Sun Yat-sen University, Guangzhou, China.  
12  
13

14 <sup>17</sup>AstraZeneca Investment China Co Ltd, Shanghai, China.  
15  
16

17  
18  
19 \*Corresponding author: Zhaohui Ni

20  
21 Email [profnizh@126.com](mailto:profnizh@126.com)  
22

23 Dongfang Road 1630, Shanghai, China  
24

25 Phone: 86 02168383121  
26

27 Fax: 86 02168383834  
28  
29  
30

## 31 **ABSTRACT**

32  
33 **Introduction:** Hyperkalemia (HK) is a potentially life-threatening electrolyte  
34 imbalance associated with several adverse clinical outcomes and is common in patients  
35 with kidney failure. However, there is no evidence on the occurrence, recurrence, and  
36 treatment of HK in patients on hemodialysis (HD) in China.  
37  
38

39  
40 **Methods and analysis:** The HK Prevalence, Recurrence, and Treatment in  
41 Haemodialysis Study (PRECEDE-K) is a prospective, multicenter, observational,  
42 cohort study being conducted across 15-18 sites in China. Approximately 600 patients  
43 with end-stage kidney disease on HD are anticipated to be enrolled and will be followed  
44 up for 24 weeks. Patients will be in the long interdialytic interval (LIDI) at enrollment  
45 and will receive follow-up care every 4 weeks in LIDI for pre-dialysis and post-dialysis  
46 (at enrollment only) serum potassium measurements. To obtain pre-dialysis serum  
47 potassium levels in the short interdialytic interval (SIDI), a follow-up visit will be  
48 performed in the SIDI during the first week. Information on concomitant medications,  
49 blood gas analysis, and biochemistry measurements will be obtained at enrollment and  
50  
51  
52  
53  
54  
55  
56  
57  
58  
59  
60

1  
2  
3  
4 at each follow-up visit. The primary endpoint will be the proportion of patients  
5 experiencing HK (defined as serum potassium level >5.0 mmol/L) at the study  
6 enrollment or during the 24-week follow-up. The key secondary endpoint will be the  
7 proportion of patients experiencing HK recurrence (defined as any HK event after the  
8 first HK event) within 1 to 6 months (if applicable) during the 24-week follow-up,  
9 including enrollment assessment.  
10  
11

12  
13  
14  
15 **Ethics and dissemination:** This study has been approved by Shanghai Jiaotong  
16 University School of Medicine, Renji Hospital Ethics Committee (2020-040). Other  
17 participating sub-centers must also obtain ethics committee approval prior to the start  
18 the study. The Good Clinical Practice (GCP) regulations shall be strictly followed  
19 during the test implementation. Amendments to the protocol will be reviewed by the  
20 ethics committees. Written informed consent will be obtained from all participants  
21 before collection of any patient data and patient information. The findings of this study  
22 will be disseminated through peer-reviewed publications and conference presentations.  
23  
24  
25

26  
27  
28  
29  
30  
31 **Study registration:** ClinicalTrials.gov, NCT04799067.  
32

33 **Key words:** dialysis, end-stage renal failure, epidemiology  
34  
35

### 36 37 **Strengths and limitations of this study**

- 38  
39 • This will be the first prospective study on the prevalence, recurrence, and  
40 treatment pattern of hyperkalemia in patients on hemodialysis in China and will  
41 provide high-quality evidence and meaningful insights for guiding physicians  
42 in clinical practice.  
43  
44
- 45 • The study will provide data on the treatment patterns for different options for  
46 the management of hyperkalemia in hemodialysis patients, but will not focus on  
47 the efficacy, safety and tolerability of different treatments.  
48  
49
- 50 • The study will not focus on the prognosis or the impact on cardiovascular events  
51 of hyperkalemia.  
52  
53  
54  
55  
56  
57  
58  
59  
60

## Introduction

The prevalence of end-stage renal disease (ESRD) is on the rise globally. In 2010, 2.618 million patients with ESRD received renal replacement therapy (RRT) worldwide and its use is projected to be more than double by 2030, with the highest prevalence in Asia.[1] Hemodialysis (HD) is the dominant treatment modality for those who are under RRT in China. According to the Report of Chinese National Renal Data System (CNRDS) in 2018, there were >1.3 million patients with ESRD in China, among whom there were 580,000 patients who were on HD.

Hyperkalemia (HK), a potentially life-threatening electrolyte imbalance can be classified depending on the severity of serum potassium (sk) levels as mild (5.1-5.9 mmol/L), moderate (6.0-6.9 mmol/L) and severe ( $\geq 7$  mmol/L).[2] Due to its detrimental effects on cardiac electrophysiology and neuromuscular function, HK has been proved to be associated with several adverse clinical outcomes, including significant arrhythmia, hospitalization and associated length of stay, and all-cause mortality[3–5]. HK is common in patients with kidney failure due to diminished renal potassium excretion, with a prevalence of 30% to 50% in patients with ESRD under maintenance HD worldwide, and is recognized as a risk factor for sudden death and all-cause mortality in patients on HD[6,7]. Chinese patients with ESRD have different spectrum of chronic kidney disease (CKD)[8], and different dietary style and treatment patterns,[9] thus they may have distinct characteristics of HK occurrence and recurrence. Besides, abnormalities of potassium, rapid changes in potassium

1  
2  
3  
4 concentrations during the HD session have been suggested as a potential cause of  
5  
6 cardiac arrhythmia.[10–13] High dietary K<sup>+</sup> intake has been associated with increased  
7  
8 5-year mortality rates in patients on HD. Therefore, dietary K<sup>+</sup> intake should be  
9  
10 restricted to 2000 mg/day and patients should be educated about dietary habits and  
11  
12 dietary regimens should be personalized for individual patients. Moreover, HK can be  
13  
14 managed by changes in dialysis prescriptions like potassium dialysate (K<sup>+</sup> D)  
15  
16 concentration and number of HD sessions.[14] A higher incidence of predialysis HK  
17  
18 after the long interdialytic interval (LIDI) was observed with K<sup>+</sup> D ≤2 mmol/L versus  
19  
20 ≥3 mmol/L). Also, 3-times-weekly HD is associated with excess volume and metabolic  
21  
22 fluctuations during the LIDI predisposing to cardiovascular morbidity and  
23  
24 mortality.[14]  
25  
26  
27  
28  
29  
30  
31

32  
33 However, there is no evidence on the occurrence, recurrence, and the treatment of  
34  
35 HK in patients undergoing HD in China. Meanwhile, there is no Chinese guidelines on  
36  
37 HK management in patients undergoing HD. In the present study, we aimed to evaluate  
38  
39 the prevalence and recurrence of HK in Chinese patients on HD and to understand the  
40  
41 treatment pattern of HK in China.  
42  
43  
44

## 45 **Methods and analysis**

### 46 ***Design***

47  
48  
49 This is a prospective, observational, cohort study, which was registered with the  
50  
51 ClinicalTrials.gov (NCT04799067) prior to initiation of patient enrollment.  
52  
53

54  
55 Patients will be in long interdialytic interval (LIDI) at enrollment visit 1 (V1).  
56  
57

58  
59 Demographic characteristics, medical history, etiology of ESRD, concomitant  
60



1  
2  
3  
4 medications, dialysis vintage, concentration of potassium dialysate (0, 1, 2, 3 mmol/L  
5  
6 or other concentration) an electrocardiogram, a pre-dialysis K<sup>+</sup> measurement and a  
7  
8 post-dialysis K<sup>+</sup> measurement, blood routine, blood gas analysis, and other blood  
9  
10 biochemistry measurements will be obtained. Potassium measurements, including pre-  
11  
12 dialysis potassium measurements at the LIDI once every month (V3-V8), pre-dialysis  
13  
14 potassium at short interdialytic interval (SIDI) during the first week (V2) for patients  
15  
16 in HD thrice a week specifically, will be performed. Information on concomitant  
17  
18 medications, blood routine, blood gas analysis, and other blood biochemistry  
19  
20 measurements will also be obtained. Besides that, evaluation of the different ions (K<sup>+</sup>,  
21  
22 Na, Mg, Ca and P) on a monthly basis, during the follow-up time with the different  
23  
24 potassium chelators in patients on HD will be conducted. In this study, control on  
25  
26 dietary intake of potassium and dialysis prescription management will be carried out  
27  
28 for the control of hyperkalemia in addition to the therapeutic.  
29  
30  
31  
32  
33  
34  
35  
36  
37  
38  
39

40 LIDI is defined as the interval between dialysis  $\geq 2$  days, while SIDI is defined as  
41  
42 the 1-day interval between dialysis. For patients receiving HD thrice weekly, there will  
43  
44 be one LIDI and two SIDI every week. For patients receiving HD twice a week, there  
45  
46 will be two LIDIs every week.  
47  
48  
49

50 The illustration of the proposed study design is shown in Figure 1 (patient on HD  
51  
52 thrice a week as an example). The detailed study plan of the PRECEDE-K study is  
53  
54 shown in Table 1.  
55  
56  
57  
58  
59  
60

**Table 1.** The Study Plan of the PRECEDE-K Study

|                                              | Visit 1      | Visit 2                     | Visit 3-8                     |
|----------------------------------------------|--------------|-----------------------------|-------------------------------|
|                                              | 1d<br>(LIDI) | 3/5d<br><sup>a</sup> (SIDI) | 4-24 w <sup>b</sup><br>(LIDI) |
| ICF                                          | X            |                             |                               |
| Screen inclusion and exclusion criteria      | X            |                             |                               |
| Demographic characteristics                  | X            |                             |                               |
| Medical history                              | X            |                             |                               |
| Etiology of ESRD                             | X            |                             |                               |
| Vascular access                              | X            |                             | X                             |
| Height (cm)                                  | X            |                             |                               |
| Pre-dialysis weight (kg)                     | X            | X                           | X                             |
| Post-dialysis weight (kg)                    | X            | X                           | X                             |
| Vital signs                                  | X            | X                           | X                             |
| Physical examination                         | X            | X                           | X                             |
| Pre-dialysis serum K <sup>+</sup> mEq/L      | X            | X                           | X                             |
| Post-dialysis serum K <sup>+</sup> mEq/L     | X            |                             | X*                            |
| Dialysis adequacy <sup>d</sup>               | X            |                             | Evaluated at week 12          |
| Dialysis frequency                           | X            |                             | X                             |
| Dialysis prescription                        | X            |                             | X                             |
| ECG <sup>e</sup>                             | X            |                             | X*                            |
| Echocardiography <sup>f</sup>                | X*           |                             | X*                            |
| Urine 24-hour volume (litres) <sup>g</sup>   |              |                             | Evaluated at week 4 or week 8 |
| Urine biochemistry measurements <sup>g</sup> |              |                             | Evaluated at week 4 or week 8 |
| Ultrafiltration rate                         | X            |                             | X                             |
| Blood routine                                | X            |                             | X                             |
| Biochemistry measurements                    | X            |                             | X                             |
| Blood gas analysis                           | X            |                             | X                             |
| Concomitant medication                       | X            | X                           | X                             |

Vital signs, physical examination, pre-dialysis K<sup>+</sup>, pre-dialysis weight, blood routine, biochemistry measurements should be collected within 30 minutes before initiation of HD. Post-dialysis weight, post-dialysis K<sup>+</sup> and post-dialysis BUN should be collected within 30 minutes after HD procedure.

All blood samples will be measured at local laboratory.

d, day; ECG, electrocardiogram; ESRD, end-stage renal disease; ICF, intracellular fluid; LIDI, long interdialytic interval; SIDI, short interdialytic interval; w, week;

<sup>a</sup>For patients receiving HD thrice a week, there are 2 SIDI in an HD section, so visit 2 can be on day 3 or day 5. For patients receiving HD twice a week, visit 2 will be waived, as there is no SIDI for these patients.

<sup>b</sup>Time window is ±1 week.

<sup>c</sup>Blood samples for the determination of pre-dialysis serum K<sup>+</sup> concentration and post-dialysis serum K<sup>+</sup> concentration will be drawn before and after the HD procedure according to the routine clinical practice.

<sup>d</sup>Dialysis adequacy will be evaluated by URR. . To calculate the URR, post-dialysis BUN will be tested on day 1 and week 12.

<sup>e</sup>ECG: evaluated within 1 day before or after the enrollment in principle; allow individual adjustments in each center. All ECGs during the follow-up should be recorded in eCRF. For patients who experience HK during the study period, it is recommended to conduct at least one more pre-dialysis ECG at LIDI.

<sup>f</sup>Echocardiography: evaluated echocardiography data if it is conducted within 2 weeks before or after visits in principle; allow individual adjustments in each center.

<sup>g</sup>Urine will be collected for a period of 24 hours at either week 4 or week 8. The volume and biochemistry measurements of the 24-hour urine sample will be measured.

### ***Study sites and period***

This study will utilize primary data collected by investigators from approximately 15-18 sites in China. Patients with ESRD on HD treatment will be enrolled and will be followed up for 24 weeks.

### ***Population***

This study will include approximately 600 patients with ESRD (aged  $\geq 18$  years) receiving HD treatment twice a week or thrice a week. Written informed consent will be obtained from all the participants (Supplementary file). Patients will be eligible to be included in the study only if all of the following criteria are applicable: (1) patients are aged  $\geq 18$  years at the time of signing the informed consent; (2) patients with ESRD and on HD; (3) the HD treatment frequency is  $\geq 2$  sessions per week; (4) capable of giving signed informed consent.

Patients will be excluded from the study if any of the following criteria are applicable:

- (1) acute kidney injury; (2) expected to receive renal transplantation within 6 months;
- (3) intracranial hemorrhage or elevated intracranial pressure within 1 month before

1  
2  
3  
4 enrollment; (4) a traumatic experience that cannot be corrected by drugs within 1 month  
5  
6 before enrollment; (5) failure to establish vascular access; (6) has been receiving  
7  
8 peritoneal dialysis; (7) not suitable for this study as judged by the investigators  
9  
10

### 11 ***Procedures for Withdrawal/Discontinuation***

12  
13 Eligible patients will be followed for up to 24 weeks, or up till occurrence of any of  
14  
15 following events, whichever occurred earlier.  
16

- 17 1. Death
- 18 2. End of study period
- 19 3. Loss to follow-up: defined as transfer to HD centre(s) not in this study, or refused  
20  
21 to continue follow-up, or cannot be contacted by phone calls for three times  
22  
23 4. Change modality of RRT (peritoneal dialysis or renal transplantation)  
24  
25 5. Withdrawal of ICF  
26  
27 6. Investigators consider it necessary for the subjects to terminate the study  
28  
29  
30

### 31 ***Primary outcome***

32  
33 The primary outcome will be proportion of patients experiencing HK (defined as serum  
34  
35 potassium levels  $>5.0$  mmol/L) at the study enrollment or during a 24-week follow-up.  
36  
37  
38  
39  
40  
41

### 42 ***Secondary outcomes***

- 43  
44 • The proportion of patients experiencing HK recurrence (defined as any HK event  
45  
46 after the first HK event) within 1, 2, 3, 4, 5, or 6 months (if applicable) during a 24-  
47  
48 week follow-up including the enrollment assessment. An HK event is defined as  
49  
50 any serum  $K^+$  concentration  $>5.0$  mmol/L within an interdialytic interval, which is  
51  
52 usually 2 to 3 days.  
53  
54
- 55  
56 • The proportion of patients with 2, 3, 4, 5, and  $\geq 6$  events of HK during a 24-week  
57  
58 follow-up including the enrollment assessment.  
59  
60

- Intradialytic potassium shift (defined as the difference between pre- and post-dialysis  $K^+$  concentration) at LIDI during the first week after patient enrollment
- Serum  $K^+$  concentration at LIDI and SIDI in patients receiving HD thrice a week during the first week after patient enrollment.
- The proportion of patients with HK treated with any potassium binders including sodium polystyrene sulfonate (SPS), calcium polystyrene sulfonate (CPS), or sodium zirconium cyclosilicate (SZC), and specific proportion of each potassium binder, respectively, during the 24-week follow-up period.
- The proportion of HK events treated with any potassium binders including SPS, CPS, or SZC among total number of HK events during the 24-week follow-up period.
- Mean daily dose of SPS, CPS, or SZC in patients treated with any potassium binder.
- Duration of the treatment of SPS, CPS, or SZC in patients treated with any potassium binders.

### ***Exploratory endpoints***

- Risk factors for experiencing any HK (defined as serum potassium level  $>5.0$  mmol/L) at the study enrollment or during a 24-week follow-up.
- Risk factors for experiencing HK recurrence during a 24-week follow-up.
- The efficacy, safety and tolerability of the options for the management of hyperkalemia in hemodialysis (HD) patients.

### ***Statistical analysis principles***

Statistical methods will be primarily descriptive in nature. For categorical data, the frequency and percentage of patients in each category will be presented. Percentages will be based on non-missing data unless otherwise specified. For continuous data, descriptive statistics will be presented as the number of patients (n), mean, standard deviation (SD), median, minimum and maximum. All successfully enrolled subjects fulfilling inclusion/exclusion criteria will be included in the Full Analysis Set (FAS), which will be the primary analysis set for all primary and secondary analyses unless specified otherwise.

### ***Primary analysis***

The proportion of patents experiencing any HK at the study enrollment or during a 24-week follow-up will be presented by the percentage as well as its 95% confidence interval. HK is defined as  $K^+ > 5.0$  mmol/L while the same summary will be generated using a higher threshold of HK as  $K^+ > 5.5$  mmol/L as well, as sensitivity analysis. The proportion of patients experiencing serum  $K^+$  concentration  $> 6.0$  mmol/L, 6.5 mmol/L, 7.0 mmol/L, and 7.5 mmol/L will be reported as well.

### ***Secondary analysis***

1. The proportion of HK recurrence within 1, 2, 3, 4, 5, or 6 month(s) after the first HK and the proportions of patients with 2, 3, 4, 5, and  $\geq 6$  times of HK events during the 24-week follow-up will be presented using the percentage and its 95% confidence interval.

1  
2  
3  
4 The HK recurrence is defined as any consecutive HK events. An HK event is defined  
5  
6 as any serum K<sup>+</sup> concentration >5.0 mmol/L within an interdialytic interval, which is  
7  
8 usually 2 to 3 days. A higher threshold of HK event as serum K<sup>+</sup> concentration >5.5  
9  
10 mmol/L will be utilized to generate similar summaries, as sensitivity analyses.  
11  
12  
13  
14

15 2. Intradialytic potassium shift is evaluated by the mean difference between pre- and  
16  
17 post-dialysis serum K<sup>+</sup> concentration during the first week after patient enrollment. If  
18  
19 there are more than one serum K<sup>+</sup> concentrations before or after HD, intradialytic  
20  
21 potassium shift will be the difference between the last serum K<sup>+</sup> concentration  
22  
23 measurement before HD and the first serum K<sup>+</sup> measurement after HD. Summary  
24  
25 statistics will be provided using mean, median, SD, minimum, and maximum. The  
26  
27 number of subjects and the missing number of subjects will also be presented.  
28  
29  
30  
31  
32  
33

34 3. Serum K<sup>+</sup> concentration at LIDI and SIDI as well as the difference between LIDI and  
35  
36 SIDI during the first week after patient enrollment will be summarized with the same  
37  
38 method as described above. This analysis will only be applicable on patients receiving  
39  
40 HD thrice a week. LIDI is defined as the interval between dialysis ( $\geq 2$  days), whereas  
41  
42 SIDI is defined as the 1-day interval between dialysis.  
43  
44  
45  
46  
47

48 4. Treatment pattern for HK with potassium binders will be assessed by: the proportion  
49  
50 of HK patients treated with any potassium binders including SPS or CPS or SZC during  
51  
52 the 24-week follow-up period. The proportion of patients with HK treated with specific  
53  
54 potassium binder including SPS, CPS, and SZC, respectively, during the 24-week  
55  
56 follow-up period; the proportion of HK events treated with any potassium binders  
57  
58  
59  
60

1  
2  
3  
4 including SPS, CPS, or SZC among total number of HK events during the 24-week  
5  
6 follow-up period; the mean daily dose of SPS, CPS, or SZC in patients treated with any  
7  
8 potassium binder; the duration of the treatment of SPS, CPS, or SZC in patients treated  
9  
10 with any potassium binder, above the categorical and continuous variables will be  
11  
12 analyzed based on previously mentioned descriptive methods, as associated summary  
13  
14 statistics, will be presented. Where for proportion, the denominator will always be the  
15  
16 number of subjects in FAS.  
17  
18  
19  
20  
21  
22

### 23 ***Exploratory analysis***

24  
25  
26 Univariate and multivariate logistic regression will be used to explore the association  
27  
28 of risk factors with any HK occurrence and recurrence. HK occurrence is defined  
29  
30 similar to that mentioned in the primary analysis, where patients experience any HK  
31  
32 (defined as serum potassium >5.0 mmol/L) at the study enrollment or during a 24-week  
33  
34 follow-up. The HK recurrence is defined similar to that mentioned in the secondary  
35  
36 analysis, where patients experienced any HK event after the first HK event will be  
37  
38 counted as with recurrence. An HK event is defined as any serum K<sup>+</sup> concentration >5.0  
39  
40 mmol/L within an interdialytic interval, which is usually 2 to 3 days. Risk factors  
41  
42 including dialysis frequency, dialysate potassium, dialysis vintage, treatment of HK,  
43  
44 medical history of special interest, including history of atherosclerotic heart disease,  
45  
46 congestive heart failure, diabetes, hypertension, uncontrolled asthma on  
47  
48 bronchodilators, dialysis adequacy (URR), urine volume, and so on. Odds ratio and 95%  
49  
50 confidence interval estimation of each risk factor (both un-adjusted and adjusted) will  
51  
52 be presented with 2-sided *P*-value provided. An exploratory sub-group analysis will be  
53  
54  
55  
56  
57  
58  
59  
60



set to evaluate the efficacy, safety and tolerability of the options for the management of hyperkalemia in hemodialysis (HD) patients.

### ***Sample size and power calculations***

The primary endpoint will be the proportion of patients experiencing HK anytime at enrollment and during a 24-week follow-up, the previously reported proportion of patients experiencing HK is 73.8% during a 2-year follow-up[9] and 58% during a 4-month follow-up.[11] In this study, an assumption is made that the proportion of patients experiencing HK will be between 58% and 73.8% during a 24-week follow-up. Precision estimates for primary endpoint under different sample sizes are presented in table 2. We assumed that 600 patients will provide a precision (half width of 95% confidence interval) estimate of 3.5% to 3.9%.

**Table 2.** Precision estimates for primary endpoint under different sample sizes

| HK Proportion | Sample Size | Precision | 95% Confidence Interval Estimate |
|---------------|-------------|-----------|----------------------------------|
| 58.0%         | 600         | 3.90%     | [54.1%, 61.9%]                   |
| 73.8%         | 600         | 3.50%     | [70.3%, 77.3%]                   |

HK, hyperkalemia

### **Data statement**

All Data will be collected and entered into the electronic case report form (eCRF). The investigator will be responsible for ensuring that the required data is collected and entered into the eCRF.

### **Quality Control**

The activities for quality control could include but are not limited to:

### ***Contacts with the sites to***

- Provide information and support to the investigator(s)
- Confirm that the research team is complying with the protocol and that data are being accurately recorded in the eCRFs
- Ensure that the subject ICFs are signed and stored at the investigator's site
- Ensure that the eCRFs are completed properly and with adequate quality.

### ***Monitoring activities for:***

- Checking of ICFs
- Checking that subjects exist in medical records

The extent and nature of monitoring will be decided during the study planning based on design, complexity, number of subjects, number of sites, etc.

Different signals (eg, high rejection rate in a site) should be used as potential identification of low protocol compliance by investigators.

If these or any other signal occurs or if the investigator is suspicious of a potential non-optimal level of protocol compliance by the site investigator, specific measures should be adopted to evaluate the situation, identify the issue and implement specific action plans to correct the situation.

### ***Training of Study Site Personnel***

The Principal Investigator will ensure that appropriate training relevant to the observational study is given to investigational staff.

### ***Patient and Public Involvement***

No patient involved.

### ***Ethics and dissemination***

This study has been approved by Shanghai Jiaotong University School of Medicine, Renji Hospital Ethics Committee (2020-040). Other participating sub-centers must also obtain ethics committee approval documents prior to the start of the study. The Good Clinical Practice (GCP) regulations shall be strictly followed during the test implementation. Amendments to the protocol will be reviewed by the ethics committees.

1  
2  
3  
4 Written informed consent will be obtained from all participants before collection of any  
5 patient data or patient information. The findings of this study will be disseminated  
6 through peer-reviewed publications and conference presentations.  
7  
8  
9

## 10 11 12 **Discussion**

13  
14  
15 HK is common in patients with kidney failure due to diminished renal potassium  
16 excretion despite the widespread and dynamic prescription of low-K<sup>+</sup> dialysis baths and  
17 K<sup>+</sup> binders. According to a prospective multicenter study in France, the percentage of  
18 patients with long-term HD experiencing HK at any time was 73.8% (K<sup>+</sup> >5.1 mmol/L),  
19 57.9% (K<sup>+</sup> >5.5 mmol/L), and 34.5% (K<sup>+</sup> >6 mmol/L).[15] Another large retrospective  
20 study analyzed data derived from the United States Renal Data System (USRDS),  
21 reported that HK prevalence was consistently estimated at 16.3 to 16.8 events per 100  
22 patient-months.[16]  
23  
24  
25  
26  
27  
28  
29  
30  
31  
32  
33  
34

35  
36 Recently, an epidemiological study reported that the prevalence of HK in Chinese  
37 outpatients is 3.86%, and the prevalence of hyperkalemia in patients with CKD  
38 increased to 22.89%.[17] However, there is no high-quality evidence on the  
39 epidemiology of HK and no Chinese guidelines on the management of HK in Chinese  
40 patients on HD. The PRECEDE-K study will evaluate the prevalence of HK in Chinese  
41 patients on HD.  
42  
43  
44  
45  
46  
47  
48  
49

50  
51 Previously, acute HK was considered as a fatal complication, however, with the  
52 deepened understanding of HK, emphasis have changed from acute HK to chronic HK  
53 in the recent years. Acute HK management involves cardiac monitoring, acute medical  
54 interventions, or possibly dialysis. However, chronic HK requires ongoing management  
55  
56  
57  
58  
59  
60

1  
2  
3  
4 to correct the underlying disturbances in potassium balance including  
5  
6 nonpharmacological and pharmacological interventions.[18] A higher rate of HK  
7  
8 recurrence was observed 1, 2, and 3 months after an HK occurrence (e.g., 35.6% of HK  
9  
10 cases with  $K^+ >6$  mmol/L within 3 months after an initial HK of the same magnitude)  
11  
12 in hepatic hemosiderosis in maintenance hemodialysis (MHD) patients despite  
13  
14 widespread prescription of low- $K^+$  dialysis baths and  $K^+$  binders).[15] Therefore, the  
15  
16 proportion of patients experiencing HK recurrence is an important secondary outcome  
17  
18 in this current study.  
19  
20  
21  
22  
23

24  
25 Compared with pre-dialysis  $K^+$ , post-dialysis  $K^+$  is rarely investigated, and so its  
26  
27 acceptable range remains unknown. Based on the difference between dialysate and  
28  
29 serum potassium levels, serum potassium levels drop significantly after HD, and 45%  
30  
31 of patients present with post-dialysis hypokalemia of  $<3.5$  mmol/L in previous  
32  
33 study.[19–21] Based on a cohort study of 3967 participants on MHD from the Dialysis  
34  
35 Outcomes and Practice Patterns Study (DOPPS) in Japan (2009-2012 and 2012-2015)  
36  
37 compared with post-dialysis potassium levels 3.0 to  $<3.5$  mEq/L, the hazard ratios of  
38  
39 post-dialysis hypokalemia ( $<3.0$  mEq/L) were 1.84 (1.44-2.34) in the unadjusted model,  
40  
41 1.44 (1.14-1.82) in the model without adjusting for pre-dialysis serum potassium levels,  
42  
43 and 1.10 (0.84-1.44) in the model adjusted for pre-dialysis serum potassium levels. This  
44  
45 research suggested that post-dialysis hypokalemia was associated with mortality, but  
46  
47 this association was not independent of pre-dialysis potassium.[22] Therefore, we  
48  
49 regarded intradialytic potassium shift (defined as the difference between pre- and post-  
50  
51 dialysis  $K^+$ ) as a secondary outcome in our research.  
52  
53  
54  
55  
56  
57  
58  
59  
60

1  
2  
3  
4 A retrospective study reported that the prevalence of HK on the day after the LIDI  
5  
6 was 2.0 to 2.4 times as high as on the day after the SIDI in patients with MHD.[16] The  
7  
8 LIDI was reported as a time of heightened risk among patients receiving HD.[23] Serum  
9  
10  $K^+$  levels at LIDI and SIDI in patients receiving HD thrice a week during the first week  
11  
12 after patient enrollment was another secondary outcome.  
13  
14  
15

16  
17 The development of HK is usually the result of a combination of factors  
18  
19 superimposed on comorbidities (eg, diabetes mellitus, advanced stages of heart failure),  
20  
21 use of potassium-based salt substitutes, and use of medications interfering with  
22  
23 potassium homeostasis-like angiotensin-converting enzyme inhibitors (ACEIs),  
24  
25 angiotensin receptor blockers (ARBs), aldosterone receptor antagonists,  $\beta$ -blockers,  
26  
27 and others.[24] Considering the potential risk factor of HK, we will record all the  
28  
29 comorbidities and drugs in this study for further exploration.  
30  
31  
32  
33

34  
35 Compared with the reference group of serum potassium level of 4.0 to 5.0 mEq/L,  
36  
37 higher serum potassium level (5.6-6.0 mEq/L) was associated with mortality in adjusted  
38  
39 analysis (HR: 1.13, CI:1.06-1.20), and higher serum potassium levels (>6.0mEq/L) was  
40  
41 associated with arrhythmia composite (includes sudden death or arrhythmia-related  
42  
43 hospitalizations) in adjusted analysis (HR: 1.21, 1.05-1.38).[25] Continuous rhythm  
44  
45 monitoring was performed using the remote-monitoring capability of the implantable  
46  
47 loop recorder device in patients undergoing HD at 8 centers.[26] In multivariate  
48  
49 survival frailty analyses, a higher risk for conduction disorder was associated with  
50  
51 plasma potassium levels >5.0 mmol/L. Further understanding and management of HK  
52  
53 will benefit the survival in MHD patients.  
54  
55  
56  
57  
58  
59  
60

1  
2  
3  
4 However, while our study will provide data on the treatment patterns for different  
5  
6 options for the management of HK in HD patients, it will not focus on the efficacy,  
7  
8 safety and tolerability of different treatments. Additionally, the study will not focus on  
9  
10 the prognosis or the impact on cardiovascular events of HK.  
11  
12  
13  
14  
15  
16

### 17 **Conflicts of interests**

18  
19 The authors declare no competing interests.  
20  
21

### 22 **Funding**

23  
24 The PRECEDE-K Study was supported by AstraZeneca Investment China Co Ltd,  
25  
26 Shanghai, China. This study was also funded by Clinical Research Plan of SHDC (No.  
27  
28 SHDC2020CR3029B) and the Multicenter Clinical Research Project of Shanghai Jiao  
29  
30 Tong University School of Medicine (DLY201805)  
31  
32  
33

### 34 **Author statement**

35  
36  
37 Principal investigator(PI) and conception, Zhaohui Ni;  
38  
39

40 Sub-PI and writing, Haijiao Jin;  
41  
42

43 Sub-PI, Renhua Lu,  
44

45 Acquisition of data and executive, Li Zuo, Weimin Yu, Yuqing Ren, Qiongqiong  
46  
47

48 Yang, Jie Xiao, Qinghong Zhang, Lihong Zhang, Xinzhou Zhang, Qinkai Chen,  
49

50 Chaosheng Chen, Guojian Shao, Qun Luo, Li Yao, Shuguang Qin and Hui Peng;  
51

52  
53 Conception and design, Qing Zhao.  
54  
55  
56  
57

58 **Figure 1.** The study design of the PRECEDE-K study  
59  
60

\*For patients receiving HD thrice a week, V2 could be at D3 or D5 for collecting pre-dialytic serum potassium at SIDI. For patients receiving HD twice a week, visit 2 will be waived as there is no SIDI for these patients; thus, there are 7 visits in total.

\*\*Time window is  $\pm 1$  week.

d, day; ESRD, end-stage renal disease; LIDI, long interdialytic interval; SIDI, short interdialytic interval; V, visit; w, week

## References

- 1 Liyanage T, Ninomiya T, Jha V, *et al.* Worldwide access to treatment for end-stage kidney disease: a systematic review. *The Lancet* 2015;**385**:1975–82. doi:10.1016/S0140-6736(14)61601-9
- 2 Palmer BF, Carrero JJ, Clegg DJ, *et al.* Clinical Management of Hyperkalemia. *Mayo Clin Proc* 2021;**96**:744–62. doi:10.1016/j.mayocp.2020.06.014
- 3 Nilsson E, Gasparini A, Ärnlöv J, *et al.* Incidence and determinants of hyperkalemia and hypokalemia in a large healthcare system. *Int J Cardiol* 2017;**245**:277–84. doi:10.1016/j.ijcard.2017.07.035
- 4 Sci-Hub | Dialysate Potassium, Serum Potassium, Mortality, and Arrhythmia Events in Hemodialysis: Results From the Dialysis Outcomes and Practice Patterns Study (DOPPS) | 10.1053/j.ajkd.2016.09.015. <https://sci-hubtw.hkvisa.net/10.1053/j.ajkd.2016.09.015> (accessed 29 Sep 2021).
- 5 Palaka E, Grandy S, Darlington O, *et al.* Associations between serum potassium and adverse clinical outcomes: A systematic literature review. *Int J Clin Pract* 2020;**74**. doi:10.1111/ijcp.13421
- 6 Herzog CA, Mangrum JM, Passman R. NON-CORONARY HEART DISEASE IN DIALYSIS PATIENTS: Sudden Cardiac Death and Dialysis Patients: SUDDEN CARDIAC DEATH IN DIALYSIS PATIENTS. *Semin Dial* 2008;**21**:300–7. doi:10.1111/j.1525-139X.2008.00455.x
- 7 Kovesdy CP, Regidor DL, Mehrotra R, *et al.* Serum and Dialysate Potassium Concentrations and Survival in Hemodialysis Patients. *Clin J Am Soc Nephrol* 2007;**2**:999–1007. doi:10.2215/CJN.04451206
- 8 Huang Y, Xu D, Long J, *et al.* Spectrum of chronic kidney disease in China: A national study based on hospitalized patients from 2010 to 2015. *Nephrology* 2019;**24**:725–36. doi:10.1111/nep.13489
- 9 Yan Y, Ramirez S, Anand S, *et al.* Twice-Weekly Hemodialysis in China: Can It Be A Better Option for Initiation or Maintenance Dialysis Therapy? *Semin Dial* 2017;**30**:277–81. doi:10.1111/sdi.12588

- 10 Bleyer AJ, Hartman J, Brannon PC, *et al.* Characteristics of sudden death in hemodialysis patients. *Kidney Int* 2006;**69**:2268–73. doi:10.1038/sj.ki.5000446
- 11 Genovesi S, Valsecchi MG, Rossi E, *et al.* Sudden death and associated factors in a historical cohort of chronic haemodialysis patients. *Nephrol Dial Transplant* 2009;**24**:2529–36. doi:10.1093/ndt/gfp104
- 12 Hung AM, Hakim RM. Dialysate and Serum Potassium in Hemodialysis. *Am J Kidney Dis* 2015;**66**:125–32. doi:10.1053/j.ajkd.2015.02.322
- 13 Labriola L, Jadoul M. Sailing Between Scylla and Charybdis: The High Serum K-Low Dialysate K Quandary. *Semin Dial* 2014;**27**:463–71. doi:10.1111/sdi.12252
- 14 Bansal S, Pergola PE. Current Management of Hyperkalemia in Patients on Dialysis. *Kidney Int Rep* 2020;**5**:779–89. doi:10.1016/j.ekir.2020.02.1028
- 15 Rossignol P, Lamiral Z, Frimat L, *et al.* Hyperkalaemia prevalence, recurrence and management in chronic haemodialysis: a prospective multicentre French regional registry 2-year survey. *Nephrol Dial Transplant* 2017;**32**:2112–8. doi:10.1093/ndt/gfx053
- 16 Yusuf AA, Hu Y, Singh B, *et al.* Serum Potassium Levels and Mortality in Hemodialysis Patients: A Retrospective Cohort Study. *Am J Nephrol* 2016;**44**:179–86. doi:10.1159/000448341
- 17 Bian J, Zuo L, Zhao H, *et al.* P0799 EPIDEMIOLOGY AND TREATMENT PATTERN OF HYPERKALAEMIA AMONG OUTPATIENTS IN CHINA: A DESCRIPTIVE STUDY USING AN ADMINISTRATIVE DATABASE IN CHINA. *Nephrol Dial Transplant* 2020;**35**. doi:10.1093/ndt/gfaa142.P0799
- 18 02-10-7259\_DBH\_Best-Practices-in-Managing-Hyperkalemia-in-CKD.pdf. [https://www.kidney.org/sites/default/files/02-10-7259\\_DBH\\_Best-Practices-in-Managing-Hyperkalemia-in-CKD.pdf](https://www.kidney.org/sites/default/files/02-10-7259_DBH_Best-Practices-in-Managing-Hyperkalemia-in-CKD.pdf) (accessed 29 Sep 2021).
- 19 Nakai S, Hanafusa N, Masakane I, *et al.* An Overview of Regular Dialysis Treatment in Japan (as of 31 December 2012): Overview of Dialysis Treatment in Japan 2012. *Ther Apher Dial* 2014;**18**:535–602. doi:10.1111/1744-9987.12281
- 20 Blumberg A, Roser H, Zehnder C, *et al.* Plasma potassium in patients with terminal renal failure during and after haemodialysis; relationship with dialytic potassium removal and total body potassium. *Nephrol Dial Transplant* 1997;**12**:1629–34. doi:10.1093/ndt/12.8.1629
- 21 Agar BU, Culleton BF, Fluck R, *et al.* Potassium kinetics during hemodialysis: Hemodialysis potassium kinetics. *Hemodial Int* 2015;**19**:23–32. doi:10.1111/hdi.12195



- 1  
2  
3  
4  
5  
6  
7  
8  
9  
10  
11  
12  
13  
14  
15  
16  
17  
18  
19  
20  
21  
22  
23  
24  
25  
26  
27  
28  
29  
30  
31  
32  
33  
34  
35  
36  
37  
38  
39  
40  
41  
42  
43  
44  
45  
46  
47  
48  
49  
50  
51  
52  
53  
54  
55  
56  
57  
58  
59  
60
- 22 Ohnishi T, Kimachi M, Fukuma S, *et al.* Postdialysis Hypokalemia and All-Cause Mortality in Patients Undergoing Maintenance Hemodialysis. *Clin J Am Soc Nephrol* 2019;**14**:873–81. doi:10.2215/CJN.07950718
- 23 Foley RN, Gilbertson DT, Murray T, *et al.* Long Interdialytic Interval and Mortality among Patients Receiving Hemodialysis. *N Engl J Med* 2011;**365**:1099–107. doi:10.1056/NEJMoal103313
- 24 Sci-Hub | Prevalence and Factors Associated with Hyperkalemia in Predialysis Patients Followed in a Low-Clearance Clinic | 10.2215/CJN.01150112. <https://sci-hubtw.hkvisa.net/10.2215/CJN.01150112> (accessed 29 Sep 2021).
- 25 Karaboyas A, Zee J, Brunelli SM, *et al.* Dialysate Potassium, Serum Potassium, Mortality, and Arrhythmia Events in Hemodialysis: Results From the Dialysis Outcomes and Practice Patterns Study (DOPPS). *Am J Kidney Dis* 2017;**69**:266–77. doi:10.1053/j.ajkd.2016.09.015
- 26 Sacher F, Jesel L, Borni-Duval C, *et al.* Cardiac Rhythm Disturbances in Hemodialysis Patients. *JACC Clin Electrophysiol* 2018;**4**:397–408. doi:10.1016/j.jacep.2017.08.002

**Word count** 4868.

1  
2  
3  
4  
5  
6  
7  
8  
9  
10  
11  
12  
13  
14  
15  
16  
17  
18  
19  
20  
21  
22  
23  
24  
25  
26  
27  
28  
29  
30  
31  
32  
33  
34  
35  
36  
37  
38  
39  
40  
41  
42  
43  
44  
45  
46  
47  
48  
49  
50  
51  
52  
53  
54  
55  
56  
57  
58  
59  
60

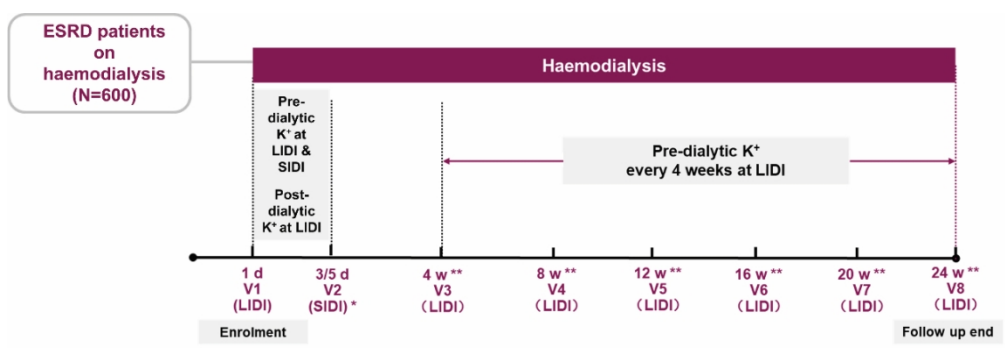

The study design of the PRECEDE-K study

374x125mm (86 x 86 DPI)

# STUDY INFORMATION AND INFORMED CONSENT FORM

There are [4] parts to this document:

- Part I: the “**Study Information**” essential to your decision to take part in the clinical study.
- Part II: the “**Future Research Information**” which explains the possibility to contribute to future research.
- Part III: your “**Consent Form**” which summarise what you may agree to.
- Part IV: supplementary information in the “**Additional information for patients**” Section.

## PART I: STUDY INFORMATION

[Study number D9480R00033 ]

Title of study: Hyperkalaemia Prevalence, Recurrence and Treatment in Haemodialysis:  
A prospective multi-centre cohort study

Dear Madam/Sir,

You are invited to take part in this study because you are diagnosed with end stage renal disease (ESRD) and is on haemodialysis (HD). Participation requires your written consent. Before you decide whether you want to participate in this study, you will be given an explanation about what the study involves.

The overall description of this study has been reviewed by an independent Ethics Committee to ensure that the rights, safety and well-being of study patients are protected.

Your condition may not improve if you join the study. But, the information we get from this study might help other patients with the same condition in the future.

## 1 What is this study about?

We are doing this study to learn more about occurrence and recurrence of hyperkalaemia (HK) in Chinese HD patients and to understand the treatment pattern of HK in China and also to better understand the risk factors associated with HK.

About 600 people from approximate 15 hospitals will take part in this study.

## 2 Do I have to take part?

You have a choice whether or not you would like to participate.

Please take as much time as you need to make a decision about whether or not you would like to participate in this study. It may be helpful to talk with your friends and family as you make this decision.

If you join the study, you can leave at any time (see “section 10” for more details).

Leaving will not affect your care. If you choose to leave the study, please let your study doctor know as soon as possible.

If you don't join the study, you will continue to receive care for your disease. Your study doctor or treating physician will talk to you about other possible treatments, their risks and benefits.

## 3 What will happen if I join the study?

Because this is an observational study, no medications or other treatments are provided to you by the Sponsor as part of this study.

You will continue to come for your routine doctor's appointments and to take your regular medication as prescribed by your doctor.

You will be in the study for about 6 months.

During the visits, information will be collected for the study and this might add some extra time to your routine visit of approximately 10 minutes.

If you cannot come to a visit, you must tell your study doctor.

Please note that the study, and your participation in the study, may be stopped earlier than expected, for example for scientific or safety reasons (see “section 6” for more details).

## 4 What are the required tests and procedures?

To conduct the study, some tests and procedures will have to be performed on you.

In addition to the standard of care examinations for the disease the following tests and procedures will be included:

- **Enrolment(Day 1, 1 visit)**: You will be in Long interdialytic interval (LIDI) at enrolment.
  - ✓ Demographic characteristics
    - Your general information such as age, gender and race will be collected.
  - ✓ Medical history, Etiology of ESRD
    - Your study doctor will collect information about your medical history (history of previous disease and surgery history) and the cause of ESRD.
  - ✓ Clinical evaluations and laboratory tests
    - Clinical evaluations, which include vascular access, physical examination, height, pre-dialysis and post-dialysis weight, electrocardiography (ECG), echocardiography(not mandatory), blood pressure, pulse, heart rate will be performed.
    - You blood will also be tested for pre-dialysis and post-dialysis serum K+, pre-dialysis BUN and post-dialysis BUN, Blood routine, Biochemistry measurements, Blood gas analysis.
    - Dialysis prescription and frequency will be collected. Dialysis adequacy will be evaluated.
  - ✓ Concomitant medication
    - Any medication used by you while participating in this study will be collected for dosage, duration and mode of administration.
- **Follow-up(24 weeks, 7 or 8 visits)**: You will be in short interdialytic interval (SIDI) at visit 2 (if applicable) and in LIDI at visit 3-8.

### **Visit 2(Only applicable for HD received thrice a week )**

- ✓ Clinical evaluations and laboratory tests
  - Clinical evaluations, which include physical examination, pre-dialysis and post-dialysis weight, blood pressure, pulse, heart rate will be performed.
  - You blood will also be tested for pre-dialysis serum K+.

- ✓ Concomitant medication
  - Any medication used by you while participating in this study will be collected for dosage, duration and mode of administration.

### Visit 3-8

- ✓ Clinical evaluations and laboratory tests
  - Clinical evaluations, which include vascular access, physical examination, pre-dialysis and post-dialysis weight, electrocardiography (ECG, not mandatory), echocardiography(not mandatory), blood pressure, pulse, heart rate will be performed when you visit the study site according to the study schedule.
  - You blood will also be tested for pre-dialysis and post-dialysis serum K+(not mandatory), pre-dialysis BUN and post-dialysis BUN, Blood routine, Biochemistry measurements, Blood gas analysis when you visit the study site according to the study schedule.
  - Dialysis prescription and frequency will be collected, and dialysis adequacy(evaluated at V5) will be evaluated at each visit.
  - Urine 24- hour volume and biochemistry measurements will be performed at V3 or V4.
- ✓ Concomitant medication
  - Any medication used by you while participating in this study will be collected for dosage, duration and mode of administration at each visit.

The complete list of tests and procedures, including their detailed schedule is available in "part 4: Additional Information for Patients".

## 5 What are the risks and possible benefits of joining the study?

There is no immediate clinical benefit for you, however the information we get from this study may help us to describe how HD patients with HK are managed in real-life practice, and to increase our knowledge about the disease and its symptoms. This will hopefully help us to better treat HD patients with HK in the future.

Since the study is observational, it will not change how your disease is managed by your doctor. There are no physical risks of taking part in this study.

## 6 What happens if something changes while I am in the study, e.g., if new information is found?

Changes may happen in the study that could make you change your mind about continuing to take part. If something changes, we will tell you as soon as possible.

You can choose to leave the study at any time. For more details see section 10 below.

The study doctor can also choose to take you out of the study if they believe that it is best for you.

Your participation in the study also stops when the Sponsor, health authorities, the ethics or regulatory agencies decide that the study must be stopped.

## 7 What happens if I am harmed or injured during the study?

If you become ill or are injured while you are in this study, you must tell your study doctor straight away.

Injuries that have been caused by the study tests or procedures are called 'research injuries'. Injuries caused by your usual medical care or your disease, are not research injuries.

The Sponsor has an insurance to cover the costs of research injuries as long as you have followed your study doctor's instructions. Sponsor will pay the costs of medical treatment for research injuries, provided that the costs are reasonable, and you did not cause the injury yourself.

## 8 What will happen to my data gathered in the study?

### a. Which data are collected?

In order to conduct the study, the Study site will have to collect and register information about your identity (such as your name, address, telephone number) as well as data that is necessary to assess your health conditions, your medical condition and medical history (this may include information from your physicians/ available in your medical records), your demographics (age, gender, *ethnic*).

### b. What are my data needed for?

Your data are needed to better understand the studied disease and associated health problems and publish research results in scientific journals or use them for educational purposes.

1  
2  
3 **c. Who can access my data?**

4 Only at the study site, your name and contact details will be accessible to the study  
5 doctor and the study team to conduct the study. Non-medical personnel acting on behalf  
6 of the sponsor and being bound by a duty of confidentiality as well as Health authorities  
7 and Ethics Committees may also be given access to this data only to verify that the study  
8 is carried out in compliance with legal and quality requirements.

9  
10  
11  
12 The study site will share your data with the sponsor but only after they have been coded  
13 (which means that your name, contact details have been replaced by a code). The  
14 sponsor may share your coded data with its Research partners and Service providers for  
15 the purposes of a drug development programme.

16  
17  
18  
19 In order to ensure proper conduct and accurate results of the study the sponsor will  
20 share your coded data with authorities and possibly with Ethics Committees. They may  
21 also be shared with scientific journals, so the study results can be reviewed by  
22 independent scientists and to ensure the accuracy of results.

23  
24  
25 In **none** of these cases your identity will be revealed.

26  
27  
28 Some of the above-mentioned persons may be located outside your country. If this other  
29 country does not have equivalent personal data protection standards than your country,  
30 appropriate Safeguards (such as contracts and technical Security measures) will be  
31 adopted to protect and maintain the confidentiality of your data.

32  
33  
34 **d. How long will my coded data be kept?**

35  
36 The study site and the sponsor are obliged to keep all study data for a number of years to  
37 comply with study site's and Sponsor's legal obligations. You can find out more about how  
38 the sponsor keeps personal information at [www.astrazenecapersonaldataretention.com](http://www.astrazenecapersonaldataretention.com).  
39 Your coded data will then be deleted or anonymised.

40  
41  
42 **e. What are my rights under data protection law?**

43 Subject to local laws, you have the right to review which of your data are collected and  
44 being used;

45  
46  
47 To ensure the scientific integrity of the study, you will not be able to review some of the  
48 data or receive a copy of it until the study ends.

49  
50  
51 **f. What does anonymised data mean?**

52  
53 Health authorities as well as pharmaceutical companies believe that access to clinical  
54 studies data advances clinical science and medical knowledge and is in the best interest  
55 of patients and public health, provided that patient privacy is protected. Therefore, the  
56  
57  
58  
59



1  
2  
3 sponsor may generate and share internally or with other researchers an anonymised set  
4 of your data collected in the study (e.g., on [www.clinicalstudydatarequest.com](http://www.clinicalstudydatarequest.com)). This  
5 means your coded data will be stripped of your Patient code as well as of any other  
6 information that could reasonably be used to identify you such as your date of birth.  
7  
8  
9

## 10 9 What are the costs of taking part?

11 Participating in this study will not cost you anything more than the costs related to your  
12 routine appointments with your doctor. You will not be paid for being in this study.  
13

14 You may be reimbursed for reasonable expenses incurred due to your participation in the  
15 study (for example: travel). If so, you will be paid RMB 150 per visit per protocol.  
16  
17  
18  
19

## 20 10 What will happen if I want to quit the study?

21 Your participation in the study is voluntary which means you can stop your participation  
22 at any time. If you want to stop your participation, you should tell the study doctor.  
23

24 If you stop participating in the study, the study doctor will stop the collection of your data  
25 but your previously collected data will be kept and used to guarantee the validity of the  
26 study and comply with regulatory requirements, as allowed by law. The study doctor will  
27 then invite you to have an end of study examination to check your wellbeing. If you don't  
28 show up at a planned visit, the study doctor will try to reach you. If the study doctor  
29 cannot reach you, public sources will be consulted to verify your wellbeing. This is  
30 important for study results. It is not mandatory but would be helpful for the study if you  
31 explain to your study doctor why you wish to stop your participation, in particular if you  
32 have experienced discomforts.  
33  
34  
35  
36  
37  
38

39 If you would like your data not to be used after you quit the study, you must inform the  
40 study doctor. In such case, your coded data previously collected will be kept as required  
41 by clinical regulations.  
42  
43  
44

## 45 11 Who can answer any questions I may have?

46 Shanghai Jiaotong University School of Medicine, Renji Hospital Ethics Committee has  
47 reviewed the plans for this study to make sure that people who take part in this study are  
48 protected from harm.  
49

50 If you have any questions about your rights during your taking part in this study, you can  
51 contact:  
52  
53  
54

55 < Qi Lu, 021-58752345 , Dongfang Road 1630, Shanghai, China >  
56  
57  
58  
59  
60

If you have any questions about the study, please contact:

|                                             |                                                                        |
|---------------------------------------------|------------------------------------------------------------------------|
| Study doctor Haijiao Jin                    | Study Coordinator (e.g. nurse appointed to the study) <insert details> |
| Phone No. 13917735313                       | Phone No. <insert details>                                             |
| Address Dongfang Road 1630, Shanghai, China | Address <insert details>                                               |

## 12 How to find out more after the study?

Information about this study will be posted on <http://astrazenecaclinicaltrials.com> and <http://www.clinicaltrials.gov>. These websites do not contain any information about you. You can visit this website for more information. You may also get other information about your participation in the study from Sponsor via your study doctor.

## PART 2: FUTURE RESEARCH INFORMATION

In addition to participating in the study, we would like to know if you would be willing that your coded data are used in future research projects with appropriate ethical approval.

You are free to consent to the use of your coded data for future research. If you decide not to do so, you may still take part in the clinical study.

### 1 What is future research?

Future research is important to advance science and public health. At present, however, it is not possible to foresee all details of future scientific research projects. These future scientific research projects are beyond the scope of the study and use of data as outlined in part 1 and may occur whilst the study is ongoing or after the study has finished.

Your coded data may only be used for scientific health-related research to find new ways to detect, treat, prevent or cure health problems.

They may also be used jointly with information from other sources outside typical clinical research settings, e.g. from public research databases. However, they will not be combined with other information in a way that could identify you. Your coded data and may also be anonymized for some of the future scientific research.

### 2 May my coded data be shared?

The sponsor may share your coded data with research partners. This may include researchers from research hospitals, and companies.

Some of the above-mentioned recipients may be located outside your country. The data protection laws which apply in those countries may not be as stringent as the laws in your country. Nevertheless, appropriate safeguards and security measures will be taken in order to protect and maintain the confidentiality of coded data.

### 3 How will my privacy be protected?

Your coded data will be subject to appropriate safeguards, and will only be used for the purpose of scientific health related research. They will not be used to contact you or to affect your care or any other decision affecting your life such as insurance rates or employment opportunities.

#### 4 What if I want to withdraw from future research?

Your participation in future research is voluntary. You are entitled to withdraw your consent for future research at any time, without giving a reason and without a negative effect on your standard of medical care. If you wish to withdraw, please inform your study doctor.

You may still continue to participate in the research study even if you choose to withdraw from future research.

If you withdraw from future research, your coded data will not be used for future research. Your coded data (either copied from the research study database or newly generated) will also be destroyed unless this information is already included in analyses or used in scientific publications or if the coded data been anonymized and therefore we can't identify your data.

#### 5 Results from Future Research?

We may have to study coded data from many people over many years before we can know if the results of future research are meaningful.

Therefore, you should not expect to receive individual results from future research projects. We will not give any such data to your doctor and we will not put them in your medical record as they are not individual valid results.

You are free to consent to the use of your coded data for FUTURE RESEARCH. If you disagree, you can indicate this in the CONSENT FORM.

**PART III: CONSENT FORM**

|              |                                                                                                              |               |  |
|--------------|--------------------------------------------------------------------------------------------------------------|---------------|--|
| Study Code:  | D9480R00033                                                                                                  | Site No:      |  |
| Sponsor:     | AstraZeneca China                                                                                            | Investigator: |  |
| Study Title: | Hyperkalaemia Prevalence, Recurrence and Treatment in Haemodialysis: A prospective multi-centre cohort study |               |  |

I confirm that:

- The study doctor or study personnel delegated by the study doctor has explained the study to me comprehensively.
- I have had the opportunity to discuss the study with the study doctor and all my questions were answered.
- I have had an adequate amount of time to consider the study.
- I have read and understood all the above information related to the study.
- I understand that I will receive a copy of this document once I have signed it.
- I understand that my decision to take part in the study is entirely voluntary. If I decide not to participate in the study or to stop my participation during the study, this will not affect my standard medical care.
- I have truthfully answered all questions about my medical history and will follow all rules listed in the document.

I consent to take part in the research study and study procedures described herein. I understand that my participation also entails:

- My name and contact details being collected during the study as described to me, and accessed and reviewed by listed authorised people;
- My coded data being used by the sponsor or by people or companies acting on its behalf or working with the sponsor;
- My coded data being used by persons or organisations located in countries that do not have data protection rules equivalent to those of my country. I understand that the sponsor monitors these uses and takes all possible measures to protect my privacy;

Study Information and Consent Form  
Study Code D9480R00033  
Master Version Number: V1.0 Master Version Date: 16Oct2020

**SIGNATURE CONSENT FORM**

Signature of participant

Date of Signature

Printed name of participant

Signature of person conducting the informed consent discussion

Date of Signature

Printed name of person conducting the informed consent discussion

Please complete the following if legally accepted representative or impartial witness is applicable.

Signature of legally accepted representative

Date of Signature

Printed name of legally accepted representative

Relationship of legally accepted representative to participant

Signature of impartial witness

Date of Signature

Printed name of impartial witness

**When signed and dated, we will give you a copy of this form.**

**PART IV: ADDITIONAL INFORMATION FOR PATIENTS****1 Sponsor details:**

|                        |                                                                                                                                                                          |
|------------------------|--------------------------------------------------------------------------------------------------------------------------------------------------------------------------|
| <b>Sponsor details</b> | Sponsor: AstraZeneca Investment (China) Co., Ltd, No.199 Liangjing Road Shanghai 201203, China<br><br>The sponsor has the overall responsibility for the research study. |
|------------------------|--------------------------------------------------------------------------------------------------------------------------------------------------------------------------|

**2 Detailed list of visits and Test/Procedures**

|                                                        | Visit 1 | Visit 2    | Visit 3 | Visit 4                       | Visit 5 | Visit 6 | Visit 7 | Visit 8 |
|--------------------------------------------------------|---------|------------|---------|-------------------------------|---------|---------|---------|---------|
|                                                        | day 1   | day 3 or 5 | week 4  | week 8                        | week 12 | week 16 | week 20 | week 24 |
| Pre-dialysis serum K <sup>+</sup>                      | X       | X          | X       | X                             | X       | X       | X       | X       |
| Post-dialysis serum K <sup>+</sup>                     | X       |            |         |                               |         |         |         |         |
| Pre-dialysis BUN & Post-dialysis BUN                   | X       |            |         |                               | X       |         |         |         |
| Blood Sample Collection routine                        | X       |            | X       | X                             | X       | X       | X       | X       |
| Blood Biochemistry measurements                        | X       |            | X       | X                             | X       | X       | X       | X       |
| Blood gas analysis                                     | X       |            | X       | X                             | X       | X       | X       | X       |
| Urine 24- hour volume & Urine sample biochemistry test |         |            | X       | X<br>(if not done at visit 3) |         |         |         |         |

# Reporting checklist for protocol of a clinical trial.

Based on the SPIRIT guidelines.

## Instructions to authors

Complete this checklist by entering the page numbers from your manuscript where readers will find each of the items listed below.

Your article may not currently address all the items on the checklist. Please modify your text to include the missing information. If you are certain that an item does not apply, please write "n/a" and provide a short explanation.

Upload your completed checklist as an extra file when you submit to a journal.

In your methods section, say that you used the SPIRIT reporting guidelines, and cite them as:

Chan A-W, Tetzlaff JM, Gøtzsche PC, Altman DG, Mann H, Berlin J, Dickersin K, Hróbjartsson A, Schulz KF, Parulekar WR, Krleža-Jerić K, Laupacis A, Moher D. SPIRIT 2013 Explanation and Elaboration: Guidance for protocols of clinical trials. *BMJ*. 2013;346:e7586

|                                             |                     | Reporting Item                                                                                               | Page Number |
|---------------------------------------------|---------------------|--------------------------------------------------------------------------------------------------------------|-------------|
| <b>Administrative information</b>           |                     |                                                                                                              |             |
| Title                                       | <a href="#">#1</a>  | Descriptive title identifying the study design, population, interventions, and, if applicable, trial acronym | 5-8         |
| Trial registration                          | <a href="#">#2a</a> | Trial identifier and registry name. If not yet registered, name of intended registry                         | 5           |
| Trial registration: data set                | <a href="#">#2b</a> | All items from the World Health Organization Trial Registration Data Set                                     | 6           |
| Protocol version                            | <a href="#">#3</a>  | Date and version identifier                                                                                  | 5           |
| Funding                                     | <a href="#">#4</a>  | Sources and types of financial, material, and other support                                                  | 18          |
| Roles and responsibilities: contributorship | <a href="#">#5a</a> | Names, affiliations, and roles of protocol contributors                                                      | 1-2,23      |



|    |                           |                     |                                                          |     |
|----|---------------------------|---------------------|----------------------------------------------------------|-----|
| 1  | Roles and                 | <a href="#">#5b</a> | Name and contact information for the trial sponsor       | 2   |
| 2  | responsibilities:         |                     |                                                          |     |
| 3  | sponsor contact           |                     |                                                          |     |
| 4  | information               |                     |                                                          |     |
| 5  |                           |                     |                                                          |     |
| 6  |                           |                     |                                                          |     |
| 7  |                           |                     |                                                          |     |
| 8  | Roles and                 | <a href="#">#5c</a> | Role of study sponsor and funders, if any, in study      | 23  |
| 9  | responsibilities:         |                     | design; collection, management, analysis, and            |     |
| 10 | sponsor and funder        |                     | interpretation of data; writing of the report; and the   |     |
| 11 |                           |                     | decision to submit the report for publication,           |     |
| 12 |                           |                     | including whether they will have ultimate authority      |     |
| 13 |                           |                     | over any of these activities                             |     |
| 14 |                           |                     |                                                          |     |
| 15 |                           |                     |                                                          |     |
| 16 |                           |                     |                                                          |     |
| 17 | Roles and                 | <a href="#">#5d</a> | Composition, roles, and responsibilities of the          | 14  |
| 18 | responsibilities:         |                     | coordinating centre, steering committee, endpoint        |     |
| 19 | committees                |                     | adjudication committee, data management team,            |     |
| 20 |                           |                     | and other individuals or groups overseeing the trial,    |     |
| 21 |                           |                     | if applicable (see Item 21a for data monitoring          |     |
| 22 |                           |                     | committee)                                               |     |
| 23 |                           |                     |                                                          |     |
| 24 |                           |                     |                                                          |     |
| 25 |                           |                     |                                                          |     |
| 26 |                           |                     |                                                          |     |
| 27 | <b>Introduction</b>       |                     |                                                          |     |
| 28 |                           |                     |                                                          |     |
| 29 |                           |                     |                                                          |     |
| 30 | Background and            | <a href="#">#6a</a> | Description of research question and justification for   | 4-5 |
| 31 | rationale                 |                     | undertaking the trial, including summary of relevant     |     |
| 32 |                           |                     | studies (published and unpublished) examining            |     |
| 33 |                           |                     | benefits and harms for each intervention                 |     |
| 34 |                           |                     |                                                          |     |
| 35 |                           |                     |                                                          |     |
| 36 | Background and            | <a href="#">#6b</a> | Explanation for choice of comparators                    | 5   |
| 37 | rationale: choice of      |                     |                                                          |     |
| 38 | comparators               |                     |                                                          |     |
| 39 |                           |                     |                                                          |     |
| 40 |                           |                     |                                                          |     |
| 41 |                           |                     |                                                          |     |
| 42 | Objectives                | <a href="#">#7</a>  | Specific objectives or hypotheses                        | 2   |
| 43 |                           |                     |                                                          |     |
| 44 | Trial design              | <a href="#">#8</a>  | Description of trial design including type of trial (eg, | 5   |
| 45 |                           |                     | parallel group, crossover, factorial, single group),     |     |
| 46 |                           |                     | allocation ratio, and framework (eg, superiority,        |     |
| 47 |                           |                     | equivalence, non-inferiority, exploratory)               |     |
| 48 |                           |                     |                                                          |     |
| 49 |                           |                     |                                                          |     |
| 50 |                           |                     |                                                          |     |
| 51 | <b>Methods:</b>           |                     |                                                          |     |
| 52 | <b>Participants,</b>      |                     |                                                          |     |
| 53 | <b>interventions, and</b> |                     |                                                          |     |
| 54 | <b>outcomes</b>           |                     |                                                          |     |
| 55 |                           |                     |                                                          |     |
| 56 |                           |                     |                                                          |     |
| 57 |                           |                     |                                                          |     |
| 58 | Study setting             | <a href="#">#9</a>  | Description of study settings (eg, community clinic,     | 6-7 |
| 59 |                           |                     |                                                          |     |
| 60 |                           |                     |                                                          |     |

|    |                      |                                                                             |      |
|----|----------------------|-----------------------------------------------------------------------------|------|
| 1  |                      | academic hospital) and list of countries where data                         |      |
| 2  |                      | will be collected. Reference to where list of study                         |      |
| 3  |                      | sites can be obtained                                                       |      |
| 4  |                      |                                                                             |      |
| 5  | Eligibility criteria | <a href="#">#10</a> Inclusion and exclusion criteria for participants. If   | 8-9  |
| 6  |                      | applicable, eligibility criteria for study centres and                      |      |
| 7  |                      | individuals who will perform the interventions (eg,                         |      |
| 8  |                      | surgeons, psychotherapists)                                                 |      |
| 9  |                      |                                                                             |      |
| 10 |                      |                                                                             |      |
| 11 |                      |                                                                             |      |
| 12 | Interventions:       | <a href="#">#11a</a> Interventions for each group with sufficient detail to | NA   |
| 13 | description          | allow replication, including how and when they will                         |      |
| 14 |                      | be administered                                                             |      |
| 15 |                      |                                                                             |      |
| 16 |                      |                                                                             |      |
| 17 | Interventions:       | <a href="#">#11b</a> Criteria for discontinuing or modifying allocated      | NA   |
| 18 | modifications        | interventions for a given trial participant (eg, drug                       |      |
| 19 |                      | dose change in response to harms, participant                               |      |
| 20 |                      | request, or improving / worsening disease)                                  |      |
| 21 |                      |                                                                             |      |
| 22 |                      |                                                                             |      |
| 23 |                      |                                                                             |      |
| 24 | Interventions:       | <a href="#">#11c</a> Strategies to improve adherence to intervention        | 7-8  |
| 25 | adherence            | protocols, and any procedures for monitoring                                |      |
| 26 |                      | adherence (eg, drug tablet return; laboratory tests)                        |      |
| 27 |                      |                                                                             |      |
| 28 |                      |                                                                             |      |
| 29 |                      |                                                                             |      |
| 30 | Interventions:       | <a href="#">#11d</a> Relevant concomitant care and interventions that       | NA   |
| 31 | concomitant care     | are permitted or prohibited during the trial                                |      |
| 32 |                      |                                                                             |      |
| 33 |                      |                                                                             |      |
| 34 | Outcomes             | <a href="#">#12</a> Primary, secondary, and other outcomes, including       | 9-10 |
| 35 |                      | the specific measurement variable (eg, systolic                             |      |
| 36 |                      | blood pressure), analysis metric (eg, change from                           |      |
| 37 |                      | baseline, final value, time to event), method of                            |      |
| 38 |                      | aggregation (eg, median, proportion), and time point                        |      |
| 39 |                      | for each outcome. Explanation of the clinical                               |      |
| 40 |                      | relevance of chosen efficacy and harm outcomes is                           |      |
| 41 |                      | strongly recommended                                                        |      |
| 42 |                      |                                                                             |      |
| 43 |                      |                                                                             |      |
| 44 |                      |                                                                             |      |
| 45 |                      |                                                                             |      |
| 46 | Participant timeline | <a href="#">#13</a> Time schedule of enrolment, interventions (including    | 6-7  |
| 47 |                      | any run-ins and washouts), assessments, and visits                          |      |
| 48 |                      | for participants. A schematic diagram is highly                             |      |
| 49 |                      | recommended (see Figure)                                                    |      |
| 50 |                      |                                                                             |      |
| 51 |                      |                                                                             |      |
| 52 |                      |                                                                             |      |
| 53 | Sample size          | <a href="#">#14</a> Estimated number of participants needed to achieve      | 14   |
| 54 |                      | study objectives and how it was determined,                                 |      |
| 55 |                      | including clinical and statistical assumptions                              |      |
| 56 |                      | supporting any sample size calculations                                     |      |
| 57 |                      |                                                                             |      |
| 58 |                      |                                                                             |      |
| 59 |                      |                                                                             |      |
| 60 |                      |                                                                             |      |

|    |                           |                      |                                                                                                                                                                                                                                                                                                                                                          |     |
|----|---------------------------|----------------------|----------------------------------------------------------------------------------------------------------------------------------------------------------------------------------------------------------------------------------------------------------------------------------------------------------------------------------------------------------|-----|
| 1  | Recruitment               | <a href="#">#15</a>  | Strategies for achieving adequate participant enrolment to reach target sample size                                                                                                                                                                                                                                                                      | 8-9 |
| 2  |                           |                      |                                                                                                                                                                                                                                                                                                                                                          |     |
| 3  |                           |                      |                                                                                                                                                                                                                                                                                                                                                          |     |
| 4  |                           |                      |                                                                                                                                                                                                                                                                                                                                                          |     |
| 5  | <b>Methods:</b>           |                      |                                                                                                                                                                                                                                                                                                                                                          | NA  |
| 6  | <b>Assignment of</b>      |                      |                                                                                                                                                                                                                                                                                                                                                          |     |
| 7  | <b>interventions (for</b> |                      |                                                                                                                                                                                                                                                                                                                                                          |     |
| 8  | <b>controlled trials)</b> |                      |                                                                                                                                                                                                                                                                                                                                                          |     |
| 9  |                           |                      |                                                                                                                                                                                                                                                                                                                                                          |     |
| 10 |                           |                      |                                                                                                                                                                                                                                                                                                                                                          |     |
| 11 | Allocation: sequence      | <a href="#">#16a</a> | Method of generating the allocation sequence (eg, computer-generated random numbers), and list of any factors for stratification. To reduce predictability of a random sequence, details of any planned restriction (eg, blocking) should be provided in a separate document that is unavailable to those who enrol participants or assign interventions | NA  |
| 12 | generation                |                      |                                                                                                                                                                                                                                                                                                                                                          |     |
| 13 |                           |                      |                                                                                                                                                                                                                                                                                                                                                          |     |
| 14 |                           |                      |                                                                                                                                                                                                                                                                                                                                                          |     |
| 15 |                           |                      |                                                                                                                                                                                                                                                                                                                                                          |     |
| 16 |                           |                      |                                                                                                                                                                                                                                                                                                                                                          |     |
| 17 |                           |                      |                                                                                                                                                                                                                                                                                                                                                          |     |
| 18 |                           |                      |                                                                                                                                                                                                                                                                                                                                                          |     |
| 19 |                           |                      |                                                                                                                                                                                                                                                                                                                                                          |     |
| 20 |                           |                      |                                                                                                                                                                                                                                                                                                                                                          |     |
| 21 |                           |                      |                                                                                                                                                                                                                                                                                                                                                          |     |
| 22 |                           |                      |                                                                                                                                                                                                                                                                                                                                                          |     |
| 23 | Allocation                | <a href="#">#16b</a> | Mechanism of implementing the allocation sequence (eg, central telephone; sequentially numbered, opaque, sealed envelopes), describing any steps to conceal the sequence until interventions are assigned                                                                                                                                                | NA  |
| 24 | concealment               |                      |                                                                                                                                                                                                                                                                                                                                                          |     |
| 25 | mechanism                 |                      |                                                                                                                                                                                                                                                                                                                                                          |     |
| 26 |                           |                      |                                                                                                                                                                                                                                                                                                                                                          |     |
| 27 |                           |                      |                                                                                                                                                                                                                                                                                                                                                          |     |
| 28 |                           |                      |                                                                                                                                                                                                                                                                                                                                                          |     |
| 29 |                           |                      |                                                                                                                                                                                                                                                                                                                                                          |     |
| 30 |                           |                      |                                                                                                                                                                                                                                                                                                                                                          |     |
| 31 | Allocation:               | <a href="#">#16c</a> | Who will generate the allocation sequence, who will enrol participants, and who will assign participants to interventions                                                                                                                                                                                                                                | NA  |
| 32 | implementation            |                      |                                                                                                                                                                                                                                                                                                                                                          |     |
| 33 |                           |                      |                                                                                                                                                                                                                                                                                                                                                          |     |
| 34 |                           |                      |                                                                                                                                                                                                                                                                                                                                                          |     |
| 35 |                           |                      |                                                                                                                                                                                                                                                                                                                                                          |     |
| 36 | Blinding (masking)        | <a href="#">#17a</a> | Who will be blinded after assignment to interventions (eg, trial participants, care providers, outcome assessors, data analysts), and how                                                                                                                                                                                                                | NA  |
| 37 |                           |                      |                                                                                                                                                                                                                                                                                                                                                          |     |
| 38 |                           |                      |                                                                                                                                                                                                                                                                                                                                                          |     |
| 39 |                           |                      |                                                                                                                                                                                                                                                                                                                                                          |     |
| 40 |                           |                      |                                                                                                                                                                                                                                                                                                                                                          |     |
| 41 |                           |                      |                                                                                                                                                                                                                                                                                                                                                          |     |
| 42 | Blinding (masking):       | <a href="#">#17b</a> | If blinded, circumstances under which unblinding is permissible, and procedure for revealing a participant's allocated intervention during the trial                                                                                                                                                                                                     | NA  |
| 43 | emergency                 |                      |                                                                                                                                                                                                                                                                                                                                                          |     |
| 44 | unblinding                |                      |                                                                                                                                                                                                                                                                                                                                                          |     |
| 45 |                           |                      |                                                                                                                                                                                                                                                                                                                                                          |     |
| 46 |                           |                      |                                                                                                                                                                                                                                                                                                                                                          |     |
| 47 | <b>Methods: Data</b>      |                      |                                                                                                                                                                                                                                                                                                                                                          |     |
| 48 | <b>collection,</b>        |                      |                                                                                                                                                                                                                                                                                                                                                          |     |
| 49 | <b>management, and</b>    |                      |                                                                                                                                                                                                                                                                                                                                                          |     |
| 50 | <b>analysis</b>           |                      |                                                                                                                                                                                                                                                                                                                                                          |     |
| 51 |                           |                      |                                                                                                                                                                                                                                                                                                                                                          |     |
| 52 |                           |                      |                                                                                                                                                                                                                                                                                                                                                          |     |
| 53 |                           |                      |                                                                                                                                                                                                                                                                                                                                                          |     |
| 54 | Data collection plan      | <a href="#">#18a</a> | Plans for assessment and collection of outcome, baseline, and other trial data, including any related processes to promote data quality (eg, duplicate measurements, training of assessors) and a                                                                                                                                                        | 8   |
| 55 |                           |                      |                                                                                                                                                                                                                                                                                                                                                          |     |
| 56 |                           |                      |                                                                                                                                                                                                                                                                                                                                                          |     |
| 57 |                           |                      |                                                                                                                                                                                                                                                                                                                                                          |     |
| 58 |                           |                      |                                                                                                                                                                                                                                                                                                                                                          |     |
| 59 |                           |                      |                                                                                                                                                                                                                                                                                                                                                          |     |
| 60 |                           |                      |                                                                                                                                                                                                                                                                                                                                                          |     |

description of study instruments (eg, questionnaires, laboratory tests) along with their reliability and validity, if known. Reference to where data collection forms can be found, if not in the protocol

|    |                        |                      |                                                           |
|----|------------------------|----------------------|-----------------------------------------------------------|
| 1  |                        |                      |                                                           |
| 2  |                        |                      |                                                           |
| 3  |                        |                      |                                                           |
| 4  |                        |                      |                                                           |
| 5  |                        |                      |                                                           |
| 6  |                        |                      |                                                           |
| 7  | Data collection plan:  | <a href="#">#18b</a> | Plans to promote participant retention and complete       |
| 8  | retention              |                      | follow-up, including list of any outcome data to be       |
| 9  |                        |                      | collected for participants who discontinue or deviate     |
| 10 |                        |                      | from intervention protocols                               |
| 11 |                        |                      |                                                           |
| 12 |                        |                      |                                                           |
| 13 |                        |                      |                                                           |
| 14 | Data management        | <a href="#">#19</a>  | Plans for data entry, coding, security, and storage,      |
| 15 |                        |                      | including any related processes to promote data           |
| 16 |                        |                      | quality (eg, double data entry; range checks for data     |
| 17 |                        |                      | values). Reference to where details of data               |
| 18 |                        |                      | management procedures can be found, if not in the         |
| 19 |                        |                      | protocol                                                  |
| 20 |                        |                      |                                                           |
| 21 |                        |                      |                                                           |
| 22 |                        |                      |                                                           |
| 23 | Statistics: outcomes   | <a href="#">#20a</a> | Statistical methods for analysing primary and             |
| 24 |                        |                      | secondary outcomes. Reference to where other              |
| 25 |                        |                      | details of the statistical analysis plan can be found, if |
| 26 |                        |                      | not in the protocol                                       |
| 27 |                        |                      |                                                           |
| 28 |                        |                      |                                                           |
| 29 |                        |                      |                                                           |
| 30 | Statistics: additional | <a href="#">#20b</a> | Methods for any additional analyses (eg, subgroup         |
| 31 | analyses               |                      | and adjusted analyses)                                    |
| 32 |                        |                      |                                                           |
| 33 |                        |                      |                                                           |
| 34 | Statistics: analysis   | <a href="#">#20c</a> | Definition of analysis population relating to protocol    |
| 35 | population and         |                      | non-adherence (eg, as randomised analysis), and           |
| 36 | missing data           |                      | any statistical methods to handle missing data (eg,       |
| 37 |                        |                      | multiple imputation)                                      |
| 38 |                        |                      |                                                           |
| 39 |                        |                      |                                                           |
| 40 |                        |                      |                                                           |
| 41 | <b>Methods:</b>        |                      |                                                           |
| 42 | <b>Monitoring</b>      |                      |                                                           |
| 43 |                        |                      |                                                           |
| 44 |                        |                      |                                                           |
| 45 | Data monitoring:       | <a href="#">#21a</a> | Composition of data monitoring committee (DMC);           |
| 46 | formal committee       |                      | summary of its role and reporting structure;              |
| 47 |                        |                      | statement of whether it is independent from the           |
| 48 |                        |                      | sponsor and competing interests; and reference to         |
| 49 |                        |                      | where further details about its charter can be found,     |
| 50 |                        |                      | if not in the protocol. Alternatively, an explanation of  |
| 51 |                        |                      | why a DMC is not needed                                   |
| 52 |                        |                      |                                                           |
| 53 |                        |                      |                                                           |
| 54 |                        |                      |                                                           |
| 55 |                        |                      |                                                           |
| 56 | Data monitoring:       | <a href="#">#21b</a> | Description of any interim analyses and stopping          |
| 57 | interim analysis       |                      | guidelines, including who will have access to these       |
| 58 |                        |                      |                                                           |
| 59 |                        |                      |                                                           |
| 60 |                        |                      |                                                           |

|    |                      |                                                                            |               |
|----|----------------------|----------------------------------------------------------------------------|---------------|
| 1  |                      | interim results and make the final decision to                             |               |
| 2  |                      | terminate the trial                                                        |               |
| 3  |                      |                                                                            |               |
| 4  | Harms                | <a href="#">#22</a> Plans for collecting, assessing, reporting, and        | supplementary |
| 5  |                      | managing solicited and spontaneously reported                              | materials     |
| 6  |                      | adverse events and other unintended effects of trial                       |               |
| 7  |                      | interventions or trial conduct                                             |               |
| 8  |                      |                                                                            |               |
| 9  |                      |                                                                            |               |
| 10 |                      |                                                                            |               |
| 11 | Auditing             | <a href="#">#23</a> Frequency and procedures for auditing trial conduct,   | 15            |
| 12 |                      | if any, and whether the process will be independent                        |               |
| 13 |                      | from investigators and the sponsor                                         |               |
| 14 |                      |                                                                            |               |
| 15 |                      |                                                                            |               |
| 16 | <b>Ethics and</b>    |                                                                            |               |
| 17 | <b>dissemination</b> |                                                                            |               |
| 18 |                      |                                                                            |               |
| 19 |                      |                                                                            |               |
| 20 | Research ethics      | <a href="#">#24</a> Plans for seeking research ethics committee /          | 14            |
| 21 | approval             | institutional review board (REC / IRB) approval                            |               |
| 22 |                      |                                                                            |               |
| 23 |                      |                                                                            |               |
| 24 | Protocol             | <a href="#">#25</a> Plans for communicating important protocol             | 14            |
| 25 | amendments           | modifications (eg, changes to eligibility criteria,                        |               |
| 26 |                      | outcomes, analyses) to relevant parties (eg,                               |               |
| 27 |                      | investigators, REC / IRBs, trial participants, trial                       |               |
| 28 |                      | registries, journals, regulators)                                          |               |
| 29 |                      |                                                                            |               |
| 30 |                      |                                                                            |               |
| 31 |                      |                                                                            |               |
| 32 | Consent or assent    | <a href="#">#26a</a> Who will obtain informed consent or assent from       | 14            |
| 33 |                      | potential trial participants or authorised surrogates,                     |               |
| 34 |                      | and how (see Item 32)                                                      |               |
| 35 |                      |                                                                            |               |
| 36 |                      |                                                                            |               |
| 37 | Consent or assent:   | <a href="#">#26b</a> Additional consent provisions for collection and use  | 14            |
| 38 | ancillary studies    | of participant data and biological specimens in                            |               |
| 39 |                      | ancillary studies, if applicable                                           |               |
| 40 |                      |                                                                            |               |
| 41 |                      |                                                                            |               |
| 42 |                      |                                                                            |               |
| 43 | Confidentiality      | <a href="#">#27</a> How personal information about potential and           | 14            |
| 44 |                      | enrolled participants will be collected, shared, and                       |               |
| 45 |                      | maintained in order to protect confidentiality before,                     |               |
| 46 |                      | during, and after the trial                                                |               |
| 47 |                      |                                                                            |               |
| 48 |                      |                                                                            |               |
| 49 | Declaration of       | <a href="#">#28</a> Financial and other competing interests for principal  | 18            |
| 50 | interests            | investigators for the overall trial and each study site                    |               |
| 51 |                      |                                                                            |               |
| 52 |                      |                                                                            |               |
| 53 | Data access          | <a href="#">#29</a> Statement of who will have access to the final trial   | 18            |
| 54 |                      | dataset, and disclosure of contractual agreements                          |               |
| 55 |                      | that limit such access for investigators                                   |               |
| 56 |                      |                                                                            |               |
| 57 |                      |                                                                            |               |
| 58 |                      |                                                                            |               |
| 59 | Ancillary and post   | <a href="#">#30</a> Provisions, if any, for ancillary and post-trial care, | NA            |
| 60 |                      |                                                                            |               |

|    |                       |                      |                                                          |               |
|----|-----------------------|----------------------|----------------------------------------------------------|---------------|
| 1  | trial care            |                      | and for compensation to those who suffer harm from       |               |
| 2  |                       |                      | trial participation                                      |               |
| 3  |                       |                      |                                                          |               |
| 4  | Dissemination policy: | <a href="#">#31a</a> | Plans for investigators and sponsor to communicate       | 19            |
| 5  | trial results         |                      | trial results to participants, healthcare professionals, |               |
| 6  |                       |                      | the public, and other relevant groups (eg, via           |               |
| 7  |                       |                      | publication, reporting in results databases, or other    |               |
| 8  |                       |                      | data sharing arrangements), including any                |               |
| 9  |                       |                      | publication restrictions                                 |               |
| 10 |                       |                      |                                                          |               |
| 11 |                       |                      |                                                          |               |
| 12 |                       |                      |                                                          |               |
| 13 |                       |                      |                                                          |               |
| 14 | Dissemination policy: | <a href="#">#31b</a> | Authorship eligibility guidelines and any intended       | 23            |
| 15 | authorship            |                      | use of professional writers                              |               |
| 16 |                       |                      |                                                          |               |
| 17 | Dissemination policy: | <a href="#">#31c</a> | Plans, if any, for granting public access to the full    | NA            |
| 18 | reproducible          |                      | protocol, participant-level dataset, and statistical     |               |
| 19 | research              |                      | code                                                     |               |
| 20 |                       |                      |                                                          |               |
| 21 |                       |                      |                                                          |               |
| 22 |                       |                      |                                                          |               |
| 23 | <b>Appendices</b>     |                      |                                                          |               |
| 24 |                       |                      |                                                          |               |
| 25 | Informed consent      | <a href="#">#32</a>  | Model consent form and other related                     | supplementary |
| 26 | materials             |                      | documentation given to participants and authorised       | materials     |
| 27 |                       |                      | surrogates                                               |               |
| 28 |                       |                      |                                                          |               |
| 29 |                       |                      |                                                          |               |
| 30 | Biological specimens  | <a href="#">#33</a>  | Plans for collection, laboratory evaluation, and         | NA            |
| 31 |                       |                      | storage of biological specimens for genetic or           |               |
| 32 |                       |                      | molecular analysis in the current trial and for future   |               |
| 33 |                       |                      | use in ancillary studies, if applicable                  |               |
| 34 |                       |                      |                                                          |               |
| 35 |                       |                      |                                                          |               |
| 36 |                       |                      |                                                          |               |

37 None The SPIRIT Explanation and Elaboration paper is distributed under the terms of the Creative  
 38 Commons Attribution License CC-BY-NC. This checklist can be completed online using  
 39 <https://www.goodreports.org/>, a tool made by the [EQUATOR Network](#) in collaboration with  
 40 [Penelope.ai](#)  
 41  
 42  
 43  
 44  
 45  
 46  
 47  
 48  
 49  
 50  
 51  
 52  
 53  
 54  
 55  
 56  
 57  
 58  
 59  
 60
